# Supplementary material for: Influence of FCGR3A genotype on the therapeutic response to rituximab in rheumatoid arthritis: an observational cohort study
Source: PubMed Central journal article supplement — BMJ Open. 2012 Sep 21;2(5):e001524. doi: 10.1136/bmjopen-2012-001524 (PMC3467642; doi:10.1136/bmjopen-2012-001524), 2012-09-21
Supplement: bmjopen-2012-001524.draft_revisions.pdf [file bmjopen-2012-001524.draft_revisions.pdf]

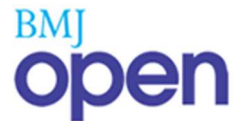

**FCGR3A genotype and the therapeutic response to rituximab in patients with rheumatoid arthritis**

|                                 |                                                                                                                                                                                                                                                                                                                                                                                                                                                                                                                                                                                                                                                                                                                                                                                                                        |
|---------------------------------|------------------------------------------------------------------------------------------------------------------------------------------------------------------------------------------------------------------------------------------------------------------------------------------------------------------------------------------------------------------------------------------------------------------------------------------------------------------------------------------------------------------------------------------------------------------------------------------------------------------------------------------------------------------------------------------------------------------------------------------------------------------------------------------------------------------------|
| Journal:                        | <i>BMJ Open</i>                                                                                                                                                                                                                                                                                                                                                                                                                                                                                                                                                                                                                                                                                                                                                                                                        |
| Manuscript ID:                  | bmjopen-2012-001524                                                                                                                                                                                                                                                                                                                                                                                                                                                                                                                                                                                                                                                                                                                                                                                                    |
| Article Type:                   | Research                                                                                                                                                                                                                                                                                                                                                                                                                                                                                                                                                                                                                                                                                                                                                                                                               |
| Date Submitted by the Author:   | 23-May-2012                                                                                                                                                                                                                                                                                                                                                                                                                                                                                                                                                                                                                                                                                                                                                                                                            |
| Complete List of Authors:       | Kastbom, Alf; Rheumatology, Department of Clinical and Experimental Medicine, Faculty of Health Sciences, Linköping University, Department of Rheumatology in Ostergotland, County Council of Ostergotland<br>Cöster, Lars; Rheumatology, Department of Clinical and Experimental Medicine, Faculty of Health Sciences, Linköping University, Department of Rheumatology in Ostergotland, County Council of Ostergotland<br>Ärlestig, Lisbeth; Umeå University, Rheumatology<br>Chatzidionysiou, Katerina; Karolinska, Rheumatology<br>van Vollenhoven, Ronald; Karolinska University Hospital, Rheumatology<br>Padyukov, Leonid; Karolinska Institutet, Rheumatology Unit, Department of Medicine<br>Rantapaa-Dahlqvist, Solbritt; University Hospital, Rheumatology<br>Saevarsdottir, Saedis; Medicine, Rheumatology |
| <b>Primary Subject Heading</b>: | Rheumatology                                                                                                                                                                                                                                                                                                                                                                                                                                                                                                                                                                                                                                                                                                                                                                                                           |
| Secondary Subject Heading:      | Rheumatology, Pharmacology and therapeutics                                                                                                                                                                                                                                                                                                                                                                                                                                                                                                                                                                                                                                                                                                                                                                            |
| Keywords:                       | RHEUMATOLOGY, IMMUNOLOGY, THERAPEUTICS                                                                                                                                                                                                                                                                                                                                                                                                                                                                                                                                                                                                                                                                                                                                                                                 |
|                                 |                                                                                                                                                                                                                                                                                                                                                                                                                                                                                                                                                                                                                                                                                                                                                                                                                        |

SCHOLARONE™  
Manuscripts

1  
2  
3 ***FCGR3A* genotype and the therapeutic response to rituximab in patients with**  
4 **rheumatoid arthritis**  
5  
6

7  
8 Alf Kastbom<sup>1</sup>, Lars Cöster<sup>1</sup>, Lisbeth Ärlestig<sup>2</sup>, Aikaterini Chatzidionysiou<sup>3,4</sup>, Ronald van  
9 Vollenhoven<sup>3,4</sup>, Leonid Padyukov<sup>3</sup>, Solbritt Rantapää-Dahlqvist<sup>2</sup>, Saedis Saevarsdottir<sup>3</sup>  
10  
11

- 12  
13  
14 1. Rheumatology, Department of Clinical and Experimental Medicine, Faculty of Health  
15 Sciences, Linköping University, Department of Rheumatology in Östergötland,  
16 County Council of Östergötland, Linköping, Sweden.  
17  
18  
19 2. Department of Public Health and Clinical Medicine/Rheumatology, Umeå University,  
20 Umeå, Sweden  
21  
22  
23 3. Rheumatology Unit, Department of Medicine, Karolinska University Hospital and  
24 Karolinska Institute, Stockholm, Sweden.  
25  
26  
27 4. Unit for Clinical Therapy Research of Inflammatory Diseases, Department of  
28 Medicine, Karolinska Institute, Stockholm, Sweden.  
29  
30  
31  
32  
33  
34  
35

36 **Corresponding Author:**

37  
38 Dr. Alf Kastbom

39  
40 Department of Clinical and Experimental Medicine, Rheumatology

41  
42 Linköping University

43  
44 SE-581 85 Linköping

45  
46  
47 Sweden  
48  
49

50  
51 alf.kastbom@liu.se  
52  
53  
54  
55  
56

57 **Key words:** Fc gamma receptor, Rheumatoid arthritis, Rituximab, Single nucleotide  
58 polymorphism, Therapy response.  
59  
60

## Abstract

**Objectives:** To determine whether a polymorphism in the Fcγ receptor type IIIA (*FCGR3A*-F158V), influencing IgG binding affinity, relates to the therapeutic efficacy of rituximab in rheumatoid arthritis (RA) patients.

**Methods:** Patients with established RA starting rituximab as part of routine care (n=177; 145 females and 32 males) were evaluated according to EULAR response criteria dichotomised into responders and non-responders. *FCGR3A*-F158V genotype was determined by a commercially available TaqMan assay.

**Results:** The frequency of responders differed significantly across *FCGR3A* genotypes ( $P=0.017$  in a 3x2 contingency table). Heterozygous patients showed the highest response rate at 83%, as compared to patients carrying 158FF (68%) or 158VV (56%) ( $p=0.028$  and  $p=0.016$ , respectively). Among 158VV patients, response rates differed between male and female patients ( $p=0.036$ ), but not among 158FF or 158VF patients ( $p=0.72$  and  $p=0.46$ , respectively).

**Conclusions:** Therapeutic efficacy of rituximab in RA patients is influenced by *FCGR3A* genotype, with the highest response rates found among heterozygous patients. This may suggest that different rituximab mechanisms of action in RA are optimally balanced in *FCGR3A*-158VF patients. Similar to the previously described associations with RA susceptibility and disease course, the impact of 158VV on rituximab response may be influenced by sex.

## Introduction

The growing arsenal of biologic agents available in rheumatoid arthritis (RA) pharmacotherapy increases the demand for predictors of therapeutic responses and/or side effects. Human Fc $\gamma$  receptors mediate effector functions of IgG antibodies and may modulate the therapeutic efficacy of all biologic substances containing IgG-Fc parts. Hence, a functional single nucleotide polymorphism in *FCGR3A* (*FCGR3A*-F158V, rs396991), influencing IgG binding affinity to the activating Fc $\gamma$  receptor type IIIA (Fc $\gamma$ RIIIA) [1], has been associated with the therapeutic efficacy of rituximab (RTX), *i.e.* an anti-CD20 B cell depleting IgG1 monoclonal antibody, in B cell malignancies [2, 3]. RTX-coated B cells may be eliminated by several mechanisms; complement-dependent cytotoxicity, antibody-dependent cytotoxicity (ADCC) by Natural Killer (NK) cells, and/or phagocytosis by Fc $\gamma$ R-bearing cells. Although the relevance in humans has not been established, mice lacking proper complement or NK-cell functions are equally well B-cell depleted as native animals, thus pointing towards a major role of Fc $\gamma$ R-bearing macrophages [4]. It has been convincingly shown that RTX binds with higher affinity to 158V in an allele-dose dependent manner and that ADCC by NK cells are affected accordingly [5]. Data regarding *FCGR3A* genotype and RTX efficacy in RA has been lacking until recently, when Ruysen-Witrand *et al* reported an association between carriage of the high-affinity binding valine (V) allele of *FCGR3A* and higher response rates to RTX [6].

Numerous case-control studies have been performed with regard to *FCGR3A*-F158V and RA susceptibility. Although initial studies showed remarkably discordant results, subsequent investigations have shown an association between homozygosity of the high-affinity allele (158VV) and an increased risk of RA in Europeans [7-10]. In studies presenting data stratified for sex, the increased risk conferred by the 158VV genotype only attributes to the male

1  
2  
3 population [7, 10]. In line with this, male patients with early RA carrying 158V have a more  
4  
5 severe disease course whereas, intriguingly, in female patients the opposite is seen [7]. The  
6  
7 biological basis for this sex difference is yet to be elucidated, but it has been shown that  
8  
9 estrogen influences both Fc $\gamma$ RIIIA expression and Fc $\gamma$ RIIIA-mediated release of TNF and IL-  
10  
11 1 $\beta$  from monocytic cells [11].  
12  
13

14  
15  
16 The current study was conducted to explore the influence of *FCGR3A* genotype on RTX  
17  
18 efficacy in RA patients.  
19  
20  
21  
22  
23  
24

## 25 **Patients & Methods**

26  
27  
28 Patients with established RA (n=177; 145 females and 32 males) who started rituximab  
29  
30 (Mabthera) as part of routine care at three rheumatology clinics in Sweden (Karolinska  
31  
32 University Hospital, Solna; Linköping University Hospital, Linköping; and Umeå University  
33  
34 Hospital, Umeå) were included in the study. Baseline characteristics and concurrent  
35  
36 medication are shown in table 1. The therapeutic response was assessed by the EULAR  
37  
38 response criteria after 3-6 months [12]. DNA was extracted from whole blood by standard  
39  
40 techniques and *FCGR3A*-F158V was genotyped by a commercially available TaqMan assay  
41  
42 (Applied Biosystems, ID C\_25815666\_10).  
43  
44  
45  
46  
47  
48  
49  
50

## 51 ***Statistical analysis***

52  
53  
54 Response rates were compared by chi square test across *FCGR3A* genotypes, and by Fisher's  
55  
56 exact test between sexes. Baseline characteristics were tested by chi square test for categorical  
57  
58  
59  
60

1  
2  
3 variables and by one-way ANOVA for continuous variables. Two-sided p-values <0.05 were  
4  
5 considered significant. Analyses were performed using SPSS version 19.  
6  
7  
8  
9

### 10 11 ***Ethical considerations*** 12

13  
14  
15 Informed consent was obtained from all patients according to the Declaration of Helsinki. The  
16  
17 study protocol was approved by the regional ethics committees in Linköping, Stockholm, and  
18  
19 Umeå.  
20  
21  
22  
23  
24  
25

### 26 27 **Results** 28

29  
30 Overall, 130 patients (73%) achieved a moderate or good EULAR response, whereas 47  
31  
32 (27%) were non-responders. The distribution of *FCGR3A* genotypes was 81 (46%) 158FF, 78  
33  
34 (44%) 158VF, and 18 (10%) 158VV, which is in agreement with previous findings in  
35  
36 Swedish RA populations [7, 13], and in Hardy-Weinberg equilibrium ( $p>0.95$ ). The  
37  
38 proportion of EULAR good responders did not differ significantly across *FCGR3A* genotypes  
39  
40 (21%, 26%, and 28% for 158FF, 158VF, and 158VV, respectively). However, the proportion  
41  
42 of good and moderate responders together, compared to non-responders, was significantly  
43  
44 different across *FCGR3A* genotypes ( $p=0.017$  in a 3x2 contingency table), where  
45  
46 heterozygous patients showed the highest response rate (65 out of 78 patients, 83%), as  
47  
48 compared to 55/81 (68%) patients carrying 158FF (OR 2.36, 95% CI 1.04-5.41,  $p=0.028$ ), and  
49  
50 10/18 (56%) 158VV patients (OR 4.0, 95%CI 1.16-13.9,  $p=0.016$ )(figure 1). The frequency  
51  
52 of responders was not significantly different between 158FF and 158VV (OR 1.69 (95% CI  
53  
54 0.53-5.37),  $p=0.4$ ). Baseline characteristics (table 1) revealed no significant differences across  
55  
56 *FCGR3A* genotypes. Experiencing a therapeutic response was more common among  
57  
58  
59  
60

1  
2  
3 rheumatoid factor (RF) positive cases as compared to RF-negative cases (OR 2.38 (1.05-  
4 5.39),  $p=0.038$ ), and in the RF-positive group, response rates remained significantly different  
5  
6 across *FCGR3A* genotype ( $p=0.004$ ), but did not reach statistical significance among RF-  
7  
8 negative cases ( $p=0.056$ ). After stratifying for sex, response rates among female patients  
9  
10 remained different in 158VF as compared to 158FF ( $p=0.047$ ) and 158VV ( $p=0.001$ ), but this  
11  
12 was not seen in the smaller group of males ( $p>0.4$ ) (figure 1). Furthermore, among 158VV  
13  
14 patients, men had significantly higher response rates than women (100% vs 39%, respectively,  
15  
16  $p=0.036$ ), while therapeutic response among 158FF or 158VF patients did not differ between  
17  
18 men and women ( $p=0.72$  and  $p=0.46$ , respectively).  
19  
20  
21  
22  
23  
24  
25  
26  
27

## 28 Discussion

29  
30  
31  
32 Although an influence of *FCGR3A*-F158V on RTX efficacy was in line with our hypothesis,  
33  
34 the lack of a clear allele-dose effect points towards a more complex role of *FCGR3A* in RTX  
35  
36 therapy of RA than anticipated. Based on previous reports of increased RTX-induced ADCC  
37  
38 [5], more pronounced peripheral B-cell depletion [14], better clinical outcomes in B-cell  
39  
40 malignancies [2, 3], we expected any difference to appear in favor of the 158VV genotype.  
41  
42

43  
44 Also, a recent study on 111 RA patients described an association between the 158V allele and  
45  
46 response to RTX [6]. Our study is, to our knowledge, the largest on this topic to date, and we  
47  
48 surprisingly found a significantly larger proportion of responders among *FCGR3A*-F158V  
49  
50 heterozygous patients, a finding to which there is no immediate explanation from previous  
51  
52 experimental work. Regarding the *in vivo* situation little is known, however, as the  
53  
54 mechanisms whereby RTX reduces signs and symptoms of RA remain incompletely  
55  
56 understood. The initial view that the disease-modifying action of RTX depends on depletion  
57  
58  
59  
60

1  
2  
3 of B cells and the eventual disappearance of pathogenic autoantibodies is contradicted by  
4  
5 several observations. For instance, although circulating autoantibodies may indeed decline,  
6  
7 they seldom disappear [15], and both non-circulating B cells and autoantibody production in  
8  
9 the synovium are clearly less affected by RTX than their circulating counterparts [16]. Other  
10  
11 proposals for RTX mode of action in RA include the immune complex decoy hypothesis,  
12  
13 suggesting that RTX-opsonized B cells keep disease-promoting FcγR-expressing phagocytic  
14  
15 cells busy eliminating B cells instead of perpetuating synovial inflammation [17]. In this  
16  
17 context, one would expect that the more pronounced activation of *FCGR3A*-158VV  
18  
19 macrophages would render them less prone to divert from the immune complex driven  
20  
21 rheumatoid inflammation in the synovium, and hence corresponding to a worse therapeutic  
22  
23 outcome in 158VV patients as seen in the current study. Alternatively, *FCGR3A*-158VV  
24  
25 individuals could, as compared to *FCGR3A*-158FF, handle RTX-opsonized B cells more  
26  
27 efficiently and may thereby, to a greater extent and more rapidly, return from this drug-  
28  
29 induced diversion. Our finding of a significantly higher response rate among heterozygous  
30  
31 patients could possibly point towards several mechanisms being involved in RTX action and  
32  
33 that, in RA, these are most optimally balanced in individuals with the intermediate binding  
34  
35 variant of FcγRIIIA, *i.e.* *FCGR3A*-158VF.  
36  
37  
38  
39  
40  
41  
42  
43  
44

45 A previous study on RA patients reported that the proportion of responders among 158VF  
46  
47 patients was significantly higher compared to 158FF cases, but that the proportion of  
48  
49 responders among 158VV were similar to 158VF, albeit failing to reach statistical  
50  
51 significance when compared to 158VF or 158FF [6]. Merging the response data from the two  
52  
53 studies yields a significantly better response rate among 158VF as compared to 158FF, (OR  
54  
55 2.82 (95% CI 1.44-5.56),  $p=0.001$ ), whereas the 158VV group does not differ significantly  
56  
57  
58  
59  
60



1  
2  
3 from neither 158VF (OR 0.41 (0.15-1.15), p= 0.067) nor 158FF (OR 1.17 (95% CI 0.46-  
4  
5 2.99), p=0.83).  
6  
7

8  
9 Shortcomings of the current study include the fact that therapeutic response was assessed with  
10  
11 up to 3 months variation between patients. However, a separate analysis of patients with  
12  
13 response assessed at 6 month (n=108) yielded similar results, making a major impact of  
14  
15 follow-up time-point unlikely. Further, the relatively limited number of male patients calls for  
16  
17 cautious interpretation of the findings regarding sex differences. Still, we believe the 158VV  
18  
19 sex difference is of interest, as no tendencies towards sex differences were found among  
20  
21 158FF and 158VF patients, despite being substantially larger groups. Also, there are  
22  
23 previously described sex dependent associations of 158VV in RA [7, 10].  
24  
25  
26  
27  
28

29 Based on currently available data, we conclude that *FCGR3A-F158V* heterozygosity is  
30  
31 associated with a better response to RTX in RA patients as compared to homozygosity of the  
32  
33 low-affinity F allele. Data regarding patients carrying two high-affinity alleles, 158VV,  
34  
35 remains inconclusive and needs to be resolved before *FCGR3A-F158V* may become clinically  
36  
37 relevant as a predictor of RTX response in RA.  
38  
39  
40  
41  
42  
43  
44

## 45 46 **Conflicts of interests**

47  
48  
49

50 RFvV has received research support and honoraria from Roche. None of the other authors  
51  
52 declare any conflicts of interest  
53  
54  
55  
56  
57  
58

## 59 **Funding**

60

1  
2  
3 This work was supported by the County Council of Östergötland; the Tore Nilson  
4  
5 Foundation; and the Reinhold Sund Foundation.  
6  
7  
8  
9  
10  
11  
12  
13  
14  
15  
16  
17  
18  
19  
20  
21  
22  
23  
24  
25  
26  
27  
28  
29  
30  
31  
32  
33  
34  
35  
36  
37  
38  
39  
40  
41  
42  
43  
44  
45  
46  
47  
48  
49  
50  
51  
52  
53  
54  
55  
56  
57  
58  
59  
60

For peer review only

**Table 1.** Baseline characteristics of the 177 RA patients according to *FCGR3A* genotype.

|                                              | <b>158VV</b><br>(n=18) | <b>158VF</b><br>(n=78) | <b>158FF</b><br>(n=81) | <b>Total</b><br>(n=177) |
|----------------------------------------------|------------------------|------------------------|------------------------|-------------------------|
| Mean (SD) disease duration, years            | 11 (6)                 | 15 (10)                | 14 (12)                | 14 (11)                 |
| Females, n (%)                               | 13 (72)                | 61 (78)                | 71 (88)                | 145 (82)                |
| Rheumatoid factor positive, n (%)            | 12 (67)                | 62 (81)                | 63 (78)                | 137 (78)                |
| Baseline DAS28, mean (SD)                    | 5.2 (1.0)              | 5.5 (1.1)              | 5.5 (1.2)              | 5.5 (1.1)               |
| Concurrent DMARD therapy, n (%)              | 15 (83)                | 48 (62)                | 59 (73)                | 122 (69)                |
| Oral glucocorticoid therapy, n (%) *         | 13 (72)                | 55 (72) #              | 48 (64) ##             | 116 (69) ###            |
| Number of previous TNF inhibitors, mean (SD) | 1.4 (1.2)              | 1.3 (1.1)              | 1.2 (1.1)              | 1.3 (1.1)               |

\* Data available on: # 76/78 patients, ## 75/81 patients, ### 169/177 patients.

## References

1. Wu J, Edberg JC, Redecha PB, Bansal V, Guyre PM, Coleman K, et al. A novel polymorphism of FcγRIIIa (CD16) alters receptor function and predisposes to autoimmune disease. *J Clin Invest*. 1997; **100**:1059-1070.
2. Cartron G, Dacheux L, Salles G, Solal-Celigny P, Bardos P, Colombat P, et al. Therapeutic activity of humanized anti-CD20 monoclonal antibody and polymorphism in IgG Fc receptor FcγRIIIa gene. *Blood*. 2002; **99**:754-758.
3. Treon SP, Hansen M, Branagan AR, Verselis S, Emmanouilides C, Kimby E, et al. Polymorphisms in FcγRIIIA (CD16) receptor expression are associated with clinical response to rituximab in Waldenström's macroglobulinemia. *J Clin Oncol*. 2005; **23**:474-481.
4. Uchida J, Hamaguchi Y, Oliver JA, Ravetch JV, Poe JC, Haas KM, et al. The innate mononuclear phagocyte network depletes B lymphocytes through Fc receptor-dependent mechanisms during anti-CD20 antibody immunotherapy. *J Exp Med*. 2004; **199**:1659-1669.
5. Dall'Ozzo S, Tartas S, Paintaud G, Cartron G, Colombat P, Bardos P, et al. Rituximab-dependent cytotoxicity by natural killer cells: influence of FCGR3A polymorphism on the concentration-effect relationship. *Cancer Res*. 2004; **64**:4664-4669.
6. Ruysen-Witrand A, Rouanet S, Combe B, Dougados M, Le Loet X, Sibia J, et al. Fcγ receptor type IIIA polymorphism influences treatment outcomes in patients with rheumatoid arthritis treated with rituximab. *Ann Rheum Dis*. Published Online First: 25 February 2012 doi:10.1136/annrheumdis-2011-200337
7. Kastbom A, Ahmadi A, Soderkvist P, Skogh T. The 158V polymorphism of Fcγ receptor type IIIA in early rheumatoid arthritis: increased susceptibility and severity in male patients (the Swedish TIRA project). *Rheumatology (Oxford)*. 2005; **44**:1294-1298.

- 1  
2  
3 8. Lee YH, Ji JD, Song GG. Associations between FCGR3A polymorphisms and  
4 susceptibility to rheumatoid arthritis: a metaanalysis. *J Rheumatol*. 2008; **35**:2129-2135.  
5
- 6  
7  
8 9. Thabet MM, Huizinga TW, Marques RB, Stoeken-Rijsbergen G, Bakker AM,  
9 Kurreeman FA, et al. Contribution of Fcgamma receptor IIIA gene 158V/F polymorphism  
10 and copy number variation to the risk of ACPA-positive rheumatoid arthritis. *Ann Rheum Dis*.  
11 2009; **68**:1775-1780.  
12
- 13  
14  
15 10. Robinson JI, Barrett JH, Taylor JC, Naven M, Corscadden D, Barton A, et al.  
16 Dissection of the FCGR3A association with RA: increased association in men and with  
17 autoantibody positive disease. *Ann Rheum Dis*. 2010; **69**:1054-1057.  
18
- 19  
20  
21 11. Kramer PR, Winger V, Kramer SF. 17beta-Estradiol utilizes the estrogen  
22 receptor to regulate CD16 expression in monocytes. *Mol Cell Endocrinol*. 2007; **279**:16-25.  
23
- 24  
25  
26 12. van Gestel AM, Prevoo ML, van 't Hof MA, van Rijswijk MH, van de Putte LB,  
27 van Riel PL. Development and validation of the European League Against Rheumatism  
28 response criteria for rheumatoid arthritis. Comparison with the preliminary American College  
29 of Rheumatology and the World Health Organization/International League Against  
30 Rheumatism Criteria. *Arthritis Rheum*. 1996; **39**:34-40.  
31
- 32  
33  
34 13. Kastbom A, Bratt J, Ernestam S, Lampa J, Padyukov L, Soderkvist P, et al.  
35 Fcgamma receptor type IIIA genotype and response to tumor necrosis factor alpha-blocking  
36 agents in patients with rheumatoid arthritis. *Arthritis Rheum*. 2007; **56**:448-452.  
37
- 38  
39  
40 14. Anolik JH, Campbell D, Felgar RE, Young F, Sanz I, Rosenblatt J, et al. The  
41 relationship of FcgammaRIIIa genotype to degree of B cell depletion by rituximab in the  
42 treatment of systemic lupus erythematosus. *Arthritis Rheum*. 2003; **48**:455-459.  
43
- 44  
45  
46 15. Cambridge G, Leandro MJ, Edwards JC, Ehrenstein MR, Salden M, Bodman-  
47 Smith M, et al. Serologic changes following B lymphocyte depletion therapy for rheumatoid  
48 arthritis. *Arthritis Rheum*. 2003; **48**:2146-2154.  
49  
50  
51  
52  
53  
54  
55  
56  
57  
58  
59  
60

- 1  
2  
3 16. Rosengren S, Wei N, Kalunian KC, Zvaifler NJ, Kavanaugh A, Boyle DL.  
4  
5 Elevated autoantibody content in rheumatoid arthritis synovia with lymphoid aggregates and  
6  
7 the effect of rituximab. *Arthritis Res Ther.* 2008; **10**:R105.  
8  
9  
10 17. Taylor RP, Lindorfer MA. Drug insight: the mechanism of action of rituximab  
11  
12 in autoimmune disease--the immune complex decoy hypothesis. *Nat Clin Pract Rheumatol.*  
13  
14 2007; **3**:86-95.  
15  
16  
17  
18  
19  
20  
21  
22  
23  
24  
25  
26  
27  
28  
29  
30  
31  
32  
33  
34  
35  
36  
37  
38  
39  
40  
41  
42  
43  
44  
45  
46  
47  
48  
49  
50  
51  
52  
53  
54  
55  
56  
57  
58  
59  
60

For peer review only

1  
2  
3  
4  
5 **Figure legends**  
6  
7  
8

9 **Figure 1.**

10 Proportion of rituximab responders in relation to *FCGR3A* genotype in RA patients.

11  
12  
13  
14 Significant differences are indicated \*  $p < 0.05$ , \*\*  $p < 0.01$ .  
15  
16  
17  
18  
19  
20  
21  
22  
23  
24  
25  
26  
27  
28  
29  
30  
31  
32  
33  
34  
35  
36  
37  
38  
39  
40  
41  
42  
43  
44  
45  
46  
47  
48  
49  
50  
51  
52  
53  
54  
55  
56  
57  
58  
59  
60

For peer review only

1  
2  
3  
4  
5  
6  
7  
8  
9  
10  
11  
12  
13  
14  
15  
16  
17  
18  
19  
20  
21  
22  
23  
24  
25  
26  
27  
28  
29  
30  
31  
32  
33  
34  
35  
36  
37  
38  
39  
40  
41  
42  
43  
44  
45  
46  
47  
48  
49  
50  
51  
52  
53  
54  
55  
56  
57  
58  
59  
60

Figure 1.

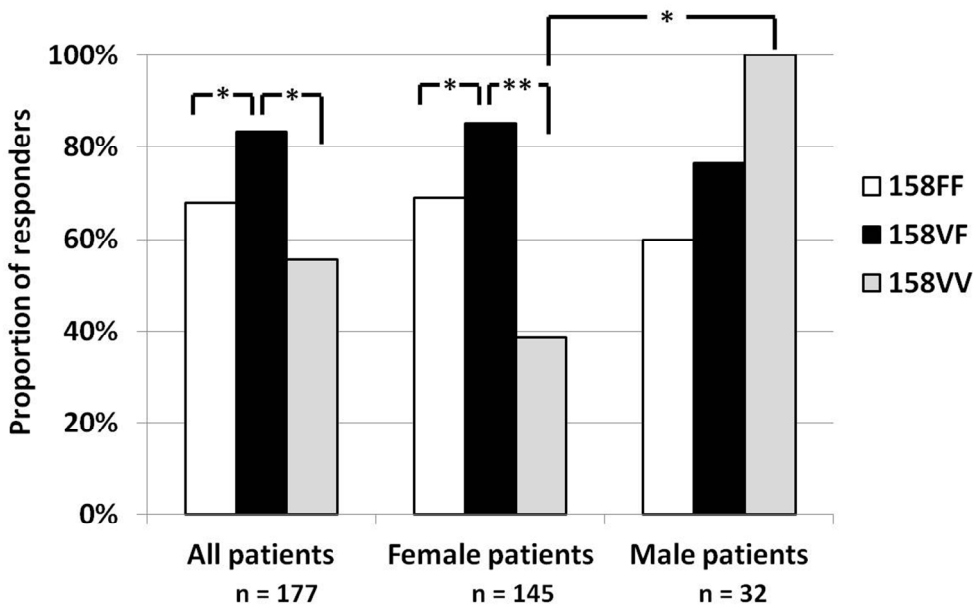

203x153mm (150 x 150 DPI)

ew only



## STROBE Statement—checklist of items that should be included in reports of observational studies

|                              | Item No | Recommendation                                                                                                                                                                                                                                                                                                                                                                                                                                                                                                                                                                                                                                                                                   |
|------------------------------|---------|--------------------------------------------------------------------------------------------------------------------------------------------------------------------------------------------------------------------------------------------------------------------------------------------------------------------------------------------------------------------------------------------------------------------------------------------------------------------------------------------------------------------------------------------------------------------------------------------------------------------------------------------------------------------------------------------------|
| <b>Title and abstract</b>    | 1       | (a) Indicate the study's design with a commonly used term in the title or the abstract<br>(b) Provide in the abstract an informative and balanced summary of what was done and what was found                                                                                                                                                                                                                                                                                                                                                                                                                                                                                                    |
| <b>Introduction</b>          |         |                                                                                                                                                                                                                                                                                                                                                                                                                                                                                                                                                                                                                                                                                                  |
| Background/rationale         | 2       | Explain the scientific background and rationale for the investigation being reported                                                                                                                                                                                                                                                                                                                                                                                                                                                                                                                                                                                                             |
| Objectives                   | 3       | State specific objectives, including any prespecified hypotheses                                                                                                                                                                                                                                                                                                                                                                                                                                                                                                                                                                                                                                 |
| <b>Methods</b>               |         |                                                                                                                                                                                                                                                                                                                                                                                                                                                                                                                                                                                                                                                                                                  |
| Study design                 | 4       | Present key elements of study design early in the paper                                                                                                                                                                                                                                                                                                                                                                                                                                                                                                                                                                                                                                          |
| Setting                      | 5       | Describe the setting, locations, and relevant dates, including periods of recruitment, exposure, follow-up, and data collection                                                                                                                                                                                                                                                                                                                                                                                                                                                                                                                                                                  |
| Participants                 | 6       | (a) <i>Cohort study</i> —Give the eligibility criteria, and the sources and methods of selection of participants. Describe methods of follow-up<br><i>Case-control study</i> —Give the eligibility criteria, and the sources and methods of case ascertainment and control selection. Give the rationale for the choice of cases and controls<br><i>Cross-sectional study</i> —Give the eligibility criteria, and the sources and methods of selection of participants<br>(b) <i>Cohort study</i> —For matched studies, give matching criteria and number of exposed and unexposed<br><i>Case-control study</i> —For matched studies, give matching criteria and the number of controls per case |
| Variables                    | 7       | Clearly define all outcomes, exposures, predictors, potential confounders, and effect modifiers. Give diagnostic criteria, if applicable                                                                                                                                                                                                                                                                                                                                                                                                                                                                                                                                                         |
| Data sources/<br>measurement | 8*      | For each variable of interest, give sources of data and details of methods of assessment (measurement). Describe comparability of assessment methods if there is more than one group                                                                                                                                                                                                                                                                                                                                                                                                                                                                                                             |
| Bias                         | 9       | Describe any efforts to address potential sources of bias                                                                                                                                                                                                                                                                                                                                                                                                                                                                                                                                                                                                                                        |
| Study size                   | 10      | Explain how the study size was arrived at                                                                                                                                                                                                                                                                                                                                                                                                                                                                                                                                                                                                                                                        |
| Quantitative variables       | 11      | Explain how quantitative variables were handled in the analyses. If applicable, describe which groupings were chosen and why                                                                                                                                                                                                                                                                                                                                                                                                                                                                                                                                                                     |
| Statistical methods          | 12      | (a) Describe all statistical methods, including those used to control for confounding<br>(b) Describe any methods used to examine subgroups and interactions<br>(c) Explain how missing data were addressed<br>(d) <i>Cohort study</i> —If applicable, explain how loss to follow-up was addressed<br><i>Case-control study</i> —If applicable, explain how matching of cases and controls was addressed<br><i>Cross-sectional study</i> —If applicable, describe analytical methods taking account of sampling strategy<br>(e) Describe any sensitivity analyses                                                                                                                                |

Continued on next page

**Results**

|                  |     |                                                                                                                                                                                                                                                                                                                                                                                                               |
|------------------|-----|---------------------------------------------------------------------------------------------------------------------------------------------------------------------------------------------------------------------------------------------------------------------------------------------------------------------------------------------------------------------------------------------------------------|
| Participants     | 13* | (a) Report numbers of individuals at each stage of study—eg numbers potentially eligible, examined for eligibility, confirmed eligible, included in the study, completing follow-up, and analysed<br>(b) Give reasons for non-participation at each stage<br>(c) Consider use of a flow diagram                                                                                                               |
| Descriptive data | 14* | (a) Give characteristics of study participants (eg demographic, clinical, social) and information on exposures and potential confounders<br>(b) Indicate number of participants with missing data for each variable of interest<br>(c) <i>Cohort study</i> —Summarise follow-up time (eg, average and total amount)                                                                                           |
| Outcome data     | 15* | <i>Cohort study</i> —Report numbers of outcome events or summary measures over time<br><i>Case-control study</i> —Report numbers in each exposure category, or summary measures of exposure<br><i>Cross-sectional study</i> —Report numbers of outcome events or summary measures                                                                                                                             |
| Main results     | 16  | (a) Give unadjusted estimates and, if applicable, confounder-adjusted estimates and their precision (eg, 95% confidence interval). Make clear which confounders were adjusted for and why they were included<br>(b) Report category boundaries when continuous variables were categorized<br>(c) If relevant, consider translating estimates of relative risk into absolute risk for a meaningful time period |
| Other analyses   | 17  | Report other analyses done—eg analyses of subgroups and interactions, and sensitivity analyses                                                                                                                                                                                                                                                                                                                |

**Discussion**

|                  |    |                                                                                                                                                                            |
|------------------|----|----------------------------------------------------------------------------------------------------------------------------------------------------------------------------|
| Key results      | 18 | Summarise key results with reference to study objectives                                                                                                                   |
| Limitations      | 19 | Discuss limitations of the study, taking into account sources of potential bias or imprecision. Discuss both direction and magnitude of any potential bias                 |
| Interpretation   | 20 | Give a cautious overall interpretation of results considering objectives, limitations, multiplicity of analyses, results from similar studies, and other relevant evidence |
| Generalisability | 21 | Discuss the generalisability (external validity) of the study results                                                                                                      |

**Other information**

|         |    |                                                                                                                                                               |
|---------|----|---------------------------------------------------------------------------------------------------------------------------------------------------------------|
| Funding | 22 | Give the source of funding and the role of the funders for the present study and, if applicable, for the original study on which the present article is based |
|---------|----|---------------------------------------------------------------------------------------------------------------------------------------------------------------|

\*Give information separately for cases and controls in case-control studies and, if applicable, for exposed and unexposed groups in cohort and cross-sectional studies.

**Note:** An Explanation and Elaboration article discusses each checklist item and gives methodological background and published examples of transparent reporting. The STROBE checklist is best used in conjunction with this article (freely available on the Web sites of PLoS Medicine at <http://www.plosmedicine.org/>, Annals of Internal Medicine at <http://www.annals.org/>, and Epidemiology at <http://www.epidem.com/>). Information on the STROBE Initiative is available at [www.strobe-statement.org](http://www.strobe-statement.org).

1  
2  
3 Reviewer: 1

4 Comments to the Author

5 The significance of this large study is limited by the fact that rituximab was  
6 not administered according to a precise scheme to treat the patients: in some  
7 patients it was a first line treatment, in others a second line...

8 Then, the time of evaluation of response was not the same between patients...

9 This type of study is difficult and should be run prospectively, according to  
10 a well defined plan, every patient receiving rituxan in first line, according  
11 to an identical procedure, and being evaluated at a precise time after  
12 infusion.

13  
14 We agree that a prospective randomised trial would be the most stringent way  
15 to assess the FCGR3A impact on rituximab efficacy. However, any clinically  
16 meaningful influence of FCGR3A would, in our opinion, appear with this 'real-  
17 life' approach. Regarding the time points of response assessment, results  
18 remained similar when analysing only response after 6 months (n=108).  
19 Therefore, we assume the impact of follow-up timing to be limited in this  
20 dataset.

21  
22  
23 Reviewer: 2

24 Comments to the Author

25 The authors investigated whether an association exists between a genetic  
26 variant in FCGR3A and the response to rituximab in patients with rheumatoid  
27 arthritis. The biological link between RTX treatment outcome and FCGR3A  
28 validates the selection of the gene. The authors conclude that patients  
29 heterozygous (VF) for the variant have a better response to treatment compared  
30 to the patients homozygous for the variant (VV or FF). The paper is well  
31 written and the methods are appropriate.

32  
33 The number of patients included in the study (n=177) is very small. This makes  
34 it difficult to draw firm conclusions concerning the observed association. It  
35 is therefore highly recommended to include a replication cohort in this study.  
36 To prove that the observed association is true.

37 The patient group carrying the VV genotype is very small (n=18) compared to  
38 the other genotype groups. It might be that the difference in response observed  
39 between the VV and VF group disappears or strengthens when a larger group is  
40 analysed. This should be addressed in more detail in the discussion.

41  
42 Of course we agree that a larger patient material would have been preferable!  
43 However, we think that our report is justified in light of the opposing  
44 results obtained in the smaller French study recently published in ARD  
45 Ruysen-Witrand *et al.* Ann Rheum Dis 2012;71:875-7. A sentence regarding the  
46 small VV group, and the discordance to the data of Ruysen-Witrand *et al* has  
47 now been introduced in the discussion (page 9)

48  
49 Due to the small study population I think it is not valid to perform  
50 stratified analysis (e.g. based on sex and RF factor) as the subgroups  
51 analysed become very small. For instance the association analysis of the male  
52 subgroup only includes 32 patients, in addition the genotypes observed in this  
53 subgroup is different from those in the females (in the females/total group  
54 the VF and FF genotype groups are almost of equal size whereas males carry  
55 more often the VF genotype). In the discussion it is indicated that the  
56 results should be taken with caution but I think genetic association analysis  
57 should not be performed with such small groups.  
58  
59  
60

1  
2  
3 Our opinion remains that these findings are of interest, given the previous  
4 finding sex differences found regarding FCGR3A and RA. Since RF is a known  
5 predictor of rituximab response in RA it was included in the analysis, but  
6 could be excluded if this is judged to improve the quality of our manuscript.

7  
8 Depicting the numbers for the genotype groups in figure 1 will make the figure  
9 easier to interpret.

10  
11 We actually believe that changing bars from representing percentages to actual  
12 numbers of patients will instead hamper the ability to visual comparison  
13 between genotype groups. We are, however, happy to provide numbers for each  
14 genotype group below the x axis instead of 177, 145, and 32 as it now stands.

15  
16 In the discussion the authors compare their data with an earlier study  
17 addressing the same question. A meta-analysis is performed indicating that the  
18 VF patients show a better treatment response. Though this analysis does not  
19 confirm the observed difference between the VF and VV genotypes. In the  
20 Swedish population the OR is 4.0 whereas the OR in the meta-analysis is 0.41.  
21 This lack of replication and more importantly the change in the direction of  
22 the association is not addressed at all in the paragraph including the meta-  
23 analysis , only in the final paragraph a remark is placed concerning the VV  
24 genotype. These observations could be addressed in more detail in the  
25 discussion.

26  
27 A remark regarding the discordance to Ruysen-Witrand *et al* has been added in  
28 the discussion (page 9)

29  
30 Reviewer: 3

31 Comments to the Author

32 This paper is well written and this is an important area of investigation.  
33 I have one major area of concern with regards to this study, which should be  
34 addressed:

35 FCGR3A and FCGR3B are highly homologous and obtaining accurate genotyping by  
36 standard allele specific methods has proven to be problematic for most groups  
37 working in this field. The authors have therefore chosen to use a commercial  
38 assay that has not been subject to validation within the public domain. The  
39 primer sequences are not included in the manuscript and I believe that this  
40 assay warrants validation by direct sequencing on the DNA samples used in the  
41 study, since the quality of DNA can have major influences over genotyping  
42 accuracy at this locus. This is particularly important given the heterozygous  
43 effect observed with RTX response.

44  
45 This is a very important remark by the reviewer. The genotype frequencies in  
46 the current study are in line with previous Swedish reports and this is now  
47 clarified in the manuscript. If the FCGR3B "allele" was detected in the  
48 assay, an increased proportion of V alleles would have been seen. Moreover,  
49 this Taqman assay has been widely used and we cannot find any indications that  
50 genotype frequencies assessed by this method deviate from what would be  
51 expected from the background populations. Although the manufacturer will not  
52 release primer sequences, we have been reassured by the company that the probe  
53 sequence is FCGR3A specific. Thus, any primer cross reactivity to FCGR3B would  
54 only result in decreased detection signals due to a lower number of FCGR3A  
55 amplicons, but would not result in FCGR3B "signaling". Low detection signals  
56 have not been a problem during FCGR3A genotyping in our lab, probably because  
57 primers are in enough excess in the assay.

1  
2  
3 Furthermore, there has been no mention of the known FCGR3A CNV. What is the  
4 prevalence of this CNV in the Swedish population? Could this explain the  
5 heterozygous effect?  
6

7 According to a previous study, approximately 95% of Swedish individuals carry  
8 2 copies of FCGR3A (Niederer HA et al: Copy number, linkage disequilibrium and  
9 disease association in the FCGR locus. Hum Mol Genet 2010;19:3282-94). We find  
10 it hard to believe that this underlies the heterozygous effect. A remark about  
11 this has been added in the discussion (page 9)  
12

13 Minor comments:

14 What was the power of this study since the numbers remain low for a  
15 pharmacogenetic study.

16 Were the p values adjusted for the number of analyses performed?

17 Please see answer to reviewer 4, point 3.

18 Clinical response was assessed between 3-6 months, which is a wide interval  
19 for a treatment that requires retreatment every 6 months. This does not appear  
20 to have been considered, evaluated or adjusted for in the analyses if  
21 necessary.  
22

23 As stated in the discussion, results remained similar when analysing only the  
24 patients with data from 6 months follow-up (n=108). Therefore, we assume that  
25 the impact of follow-up timing is limited in this dataset.  
26

27 Whilst the discussion was well written, the mechanism of the heterozygous  
28 effect received a disproportionately large word count compared to discussion  
29 of the limitations of the study, for which potential genotyping error, low  
30 statistical power and large numbers of statistical tests are prominent.  
31

32 A couple of remarks have been added in the discussion (p.9) regarding the  
33 limitations of the study.  
34

35 Reviewer: 4

36 Comments to the Author

37 Kastbom and colleagues attempted to decipher the possible value of FcGRIIIa  
38 genotyping in predicting the response to rituximab. Although such studies are  
39 of importance for the possible fine tuning of treatments, there are several  
40 concerns with this paper that deserve the attention of the authors.  
41

42 1 The number of patients (177) is very low for these kind of studies. There is  
43 a big concern for the possible role of Type I / Type II errors.  
44

45 We agree that a larger patient material would have been preferable! Still,  
46 this is the largest study available on this topic.  
47

48 2. Looking at the role of FcGRIIIa the authors are trying to assess whether a  
49 primary immune mediated response is associated with a clinical response, the  
50 DAS28. I have severe problems with this strategy. BAsed on what is mentioned  
51 above, wouldn't it be better to relate the genotyping to the absolute response  
52 in DAS rather than the EULAR defined respondership which was designed to  
53 follow therapy only. Maybe than, differences become more clearer.  
54

55 This is an important remark by the reviewer. We did analyse absolute DAS28  
56 changes, and found very similar results. This is now pointed out in the  
57 results section.  
58  
59  
60

1  
2  
3  
4  
5  
6  
7  
8  
9  
10  
11  
12  
13  
14  
15  
16  
17  
18  
19  
20  
21  
22  
23  
24  
25  
26  
27  
28  
29  
30  
31  
32  
33  
34  
35  
36  
37  
38  
39  
40  
41  
42  
43  
44  
45  
46  
47  
48  
49  
50  
51  
52  
53  
54  
55  
56  
57  
58  
59  
60

3. There need to be corrected for multiple comparison

We disagree with the reviewer on this point. We do not see the need for statistical correction regarding our à-priori decided main question, i.e. whether one genotype associates with one outcome (therapeutic response) and one stratification (sex).

For peer review only

1  
2  
3 ***FCGR3A* genotype and the therapeutic response to rituximab in patients with**  
4 **rheumatoid arthritis**  
5

6  
7 Alf Kastbom<sup>1</sup>, Lars Cöster<sup>1</sup>, Lisbeth Ärlestig<sup>2</sup>, Aikaterini Chatzidionysiou<sup>3,4</sup>, Ronald van  
8 Vollenhoven<sup>3,4</sup>, Leonid Padyukov<sup>3</sup>, Solbritt Rantapää-Dahlqvist<sup>2</sup>, Saedis Saevarsdottir<sup>3</sup>  
9  
10

- 11  
12  
13 1. Rheumatology, Department of Clinical and Experimental Medicine, Faculty of Health  
14 Sciences, Linköping University, Department of Rheumatology in Östergötland,  
15 County Council of Östergötland, Linköping, Sweden.  
16  
17  
18 2. Department of Public Health and Clinical Medicine/Rheumatology, Umeå University,  
19 Umeå, Sweden  
20  
21  
22 3. Rheumatology Unit, Department of Medicine, Karolinska University Hospital and  
23 Karolinska Institute, Stockholm, Sweden.  
24  
25  
26 4. Unit for Clinical Therapy Research of Inflammatory Diseases, Department of  
27 Medicine, Karolinska Institute, Stockholm, Sweden.  
28  
29  
30  
31  
32

33  
34 **Corresponding Author:**  
35

36 Dr. Alf Kastbom  
37

38 Department of Clinical and Experimental Medicine, Rheumatology  
39

40 Linköping University  
41

42 SE-581 85 Linköping  
43

44 Sweden  
45

46  
47 alf.kastbom@liu.se  
48  
49  
50  
51  
52

53 **Key words:** Fc gamma receptor, Rheumatoid arthritis, Rituximab, Single nucleotide  
54 polymorphism, Therapy response.  
55  
56  
57  
58  
59  
60

### Article focus

- A functional polymorphism in the gene encoding Fcγ receptor type IIIA (FCGR3A) influences the outcome of B cell-depleting therapy with rituximab in malignancies.
- Although rituximab is frequently used for the therapy of severe RA, studies on RA patients have been lacking.
- We wished to determine if FCGR3A-F158V genotype associates with rituximab efficacy in RA.

### Key Messages:

- FCGR3A heterozygous patients experienced significantly higher response rates than 158FF and 158VV.
- The results are discordant to a similar recently published study based on 111 RA patients
- There are indications of a sex-specific effect of the 158VV genotype, as have been previously described regarding RA susceptibility and disease course.

### Strengths and limitations:

- Although limited by the small numbers of males and 158VV patients, this is until now the largest published study on FCGR3A and rituximab in RA patients.
- Differences could have been attenuated by the ‘real-life’ approach, *i.e.* that therapy was not administered by a standardised scheme, and the time to evaluation varied between patients.

### **Abstract**

**Objectives:** To determine whether a polymorphism in the Fcγ receptor type IIIA (*FCGR3A*-F158V), influencing IgG binding affinity, relates to the therapeutic efficacy of rituximab in rheumatoid arthritis (RA) patients.

**Design:** Cohort study

**Setting:** Three university hospital rheumatology units in Sweden.



**Participants:** Patients with established RA (n=177; 145 females and 32 males) who started rituximab (Mabthera) as part of routine care.

**Primary outcome measures:** Response to rituximab therapy in relation to FCGR3A genotype, including stratification for sex.

~~**Methods:** Patients with established RA starting rituximab as part of routine care (n=177; 145 females and 32 males) were evaluated according to EULAR response criteria dichotomised into responders and non-responders. FCGR3A-F158V genotype was determined by a commercially available TaqMan assay.~~

**Results:** The frequency of responders differed significantly across *FCGR3A* genotypes ( $P=0.017$  in a 3x2 contingency table). Heterozygous patients showed the highest response rate at 83%, as compared to patients carrying 158FF (68%) or 158VV (56%) ( $p=0.028$  and  $p=0.016$ , respectively). Among 158VV patients, response rates differed between male and female patients ( $p=0.036$ ), but not among 158FF or 158VF patients ( $p=0.72$  and  $p=0.46$ , respectively).

**Conclusions:** Therapeutic efficacy of rituximab in RA patients is influenced by *FCGR3A* genotype, with the highest response rates found among heterozygous patients. This may suggest that different rituximab mechanisms of action in RA are optimally balanced in *FCGR3A*-158VF patients. Similar to the previously described associations with RA susceptibility and disease course, the impact of 158VV on rituximab response may be influenced by sex.

## Introduction

The growing arsenal of biologic agents available in rheumatoid arthritis (RA) pharmacotherapy increases the demand for predictors of therapeutic responses and/or side effects. Human Fc $\gamma$  receptors mediate effector functions of IgG antibodies and may modulate the therapeutic efficacy of all biologic substances containing IgG-Fc parts. Hence, a functional single nucleotide polymorphism in *FCGR3A* (*FCGR3A*-F158V, rs396991), influencing IgG binding affinity to the activating Fc $\gamma$  receptor type IIIA (Fc $\gamma$ RIIIA) [1], has been associated with the therapeutic efficacy of rituximab (RTX), *i.e.* an anti-CD20 B cell depleting IgG1 monoclonal antibody, in B cell malignancies [2, 3]. RTX-coated B cells may be eliminated by several mechanisms; complement-dependent cytotoxicity, antibody-dependent cytotoxicity (ADCC) by Natural Killer (NK) cells, and/or phagocytosis by Fc $\gamma$ R-bearing cells. Although the relevance in humans has not been established, mice lacking proper complement or NK-cell functions are equally well B-cell depleted as native animals, thus pointing towards a major role of Fc $\gamma$ R-bearing macrophages [4]. It has been convincingly shown that RTX binds with higher affinity to 158V in an allele-dose dependent manner and that ADCC by NK cells are affected accordingly [5]. Data regarding *FCGR3A* genotype and RTX efficacy in RA has been lacking until recently, when Ruysen-Witrand *et al* reported an association between carriage of the high-affinity binding valine (V) allele of *FCGR3A* and higher response rates to RTX [6].

Numerous case-control studies have been performed with regard to *FCGR3A*-F158V and RA susceptibility. Although initial studies showed remarkably discordant results, subsequent investigations have shown an association between homozygosity of the high-affinity allele (158VV) and an increased risk of RA in Europeans [7-10]. In studies presenting data stratified for sex, the increased risk conferred by the 158VV genotype only attributes to the male

1  
2  
3 population [7, 10]. In line with this, male patients with early RA carrying 158V have a more  
4  
5 severe disease course whereas, intriguingly, in female patients the opposite is seen [7]. The  
6  
7 biological basis for this sex difference is yet to be elucidated, but it has been shown that  
8  
9 estrogen influences both FcγRIIIA expression and FcγRIIIA-mediated release of TNF and IL-  
10  
11 1β from monocytic cells [11].  
12  
13

14  
15 The current study was conducted to explore the influence of *FCGR3A* genotype on RTX  
16  
17 efficacy in RA patients.  
18  
19

## 20 21 22 23 **Patients & Methods**

24  
25  
26 Patients with established RA (n=177; 145 females and 32 males) who started rituximab  
27  
28 (Mabthera) as part of routine care at three rheumatology clinics in Sweden (Karolinska  
29  
30 University Hospital, Solna; Linköping University Hospital, Linköping; and Umeå University  
31  
32 Hospital, Umeå) were included in the study. Baseline characteristics and concurrent  
33  
34 medication are shown in table 1. The therapeutic response was assessed by the EULAR  
35  
36 response criteria after 3-6 months [12]. DNA was extracted from whole blood by standard  
37  
38 techniques and *FCGR3A*-F158V was genotyped by a commercially available TaqMan assay  
39  
40 (Applied Biosystems, ID C\_25815666\_10).  
41  
42  
43  
44  
45  
46  
47

## 48 ***Statistical analysis***

49  
50  
51 Response rates were compared by chi square test across *FCGR3A* genotypes, and by Fisher's  
52  
53 exact test between sexes. Baseline characteristics were tested by chi square test for categorical  
54  
55  
56  
57  
58  
59  
60

1  
2  
3 variables and by one-way ANOVA for continuous variables. Two-sided p-values <0.05 were  
4  
5 considered significant. Analyses were performed using SPSS version 19.  
6  
7

### 8 9 10 11 ***Ethical considerations***

12  
13  
14 Informed consent was obtained from all patients according to the Declaration of Helsinki. The  
15  
16 study protocol was approved by the regional ethics committees in Linköping, Stockholm, and  
17  
18 Umeå.  
19

### 20 21 22 23 24 25 **Results**

26  
27  
28 Overall, 130 patients (73%) achieved a moderate or good EULAR response, whereas 47  
29  
30 (27%) were non-responders. The distribution of *FCGR3A* genotypes was 81 (46%) 158FF, 78  
31  
32 (44%) 158VF, and 18 (10%) 158VV, which is in agreement with previous findings in  
33  
34 Swedish RA populations [7, 13], and in Hardy-Weinberg equilibrium ( $p>0.95$ ). The  
35  
36 proportion of EULAR good responders did not differ significantly across *FCGR3A* genotypes  
37  
38 (21%, 26%, and 28% for 158FF, 158VF, and 158VV, respectively). However, the proportion  
39  
40 of good and moderate responders together, compared to non-responders, was significantly  
41  
42 different across *FCGR3A* genotypes ( $p=0.017$  in a 3x2 contingency table), where  
43  
44 heterozygous patients showed the highest response rate (65 out of 78 patients, 83%), as  
45  
46 compared to 55/81 (68%) patients carrying 158FF (OR 2.36, 95% CI 1.04-5.41,  $p=0.028$ ), and  
47  
48 10/18 (56%) 158VV patients (OR 4.0, 95%CI 1.16-13.9,  $p=0.016$ )(figure 1). The frequency  
49  
50 of responders was not significantly different between 158FF and 158VV (OR 1.69 (95% CI  
51  
52 0.53-5.37),  $p=0.4$ ). Baseline characteristics (table 1) revealed no significant differences across  
53  
54  
55  
56  
57 *FCGR3A* genotypes. Experiencing a therapeutic response was more common among

1  
2  
3  
4  
5  
6  
7  
8  
9  
10  
11  
12  
13  
14  
15  
16  
17  
18  
19  
20  
21  
22  
23  
24  
25  
26  
27  
28  
29  
30  
31  
32  
33  
34  
35  
36  
37  
38  
39  
40  
41  
42  
43  
44  
45  
46  
47  
48  
49  
50  
51  
52  
53  
54  
55  
56  
57  
58  
59  
60

rheumatoid factor (RF) positive cases as compared to RF-negative cases (OR 2.38 (1.05-5.39),  $p=0.038$ ), and in the RF-positive group, response rates remained significantly different across *FCGR3A* genotype ( $p=0.004$ ), but did not reach statistical significance among RF-negative cases ( $p=0.056$ ). After stratifying for sex, response rates among female patients remained different in 158VF as compared to 158FF ( $p=0.047$ ) and 158VV ( $p=0.001$ ), but this was not seen in the smaller group of males ( $p>0.4$ ) (figure 1). Furthermore, among 158VV patients, men had significantly higher response rates than women (100% vs 39%, respectively,  $p=0.036$ ), while therapeutic response among 158FF or 158VF patients did not differ between men and women ( $p=0.72$  and  $p=0.46$ , respectively). [Absolute changes in DAS28 in relation to FCGR3A yielded similar results as for categorical EULAR responses \(data not shown\).](#)

## Discussion

Although an influence of *FCGR3A*-F158V on RTX efficacy was in line with our hypothesis, the lack of a clear allele-dose effect points towards a more complex role of *FCGR3A* in RTX therapy of RA than anticipated. Based on previous reports of increased RTX-induced ADCC [5], more pronounced peripheral B-cell depletion [14], better clinical outcomes in B-cell malignancies [2, 3], we expected any difference to appear in favor of the 158VV genotype. Also, a recent study on 111 RA patients described an association between the 158V allele and response to RTX [6]. Our study is, to our knowledge, the largest on this topic to date, and we surprisingly found a significantly larger proportion of responders among *FCGR3A*-F158V heterozygous patients, a finding to which there is no immediate explanation from previous experimental work. Regarding the *in vivo* situation little is known, however, as the mechanisms whereby RTX reduces signs and symptoms of RA remain incompletely

1  
2  
3 understood. The initial view that the disease-modifying action of RTX depends on depletion  
4  
5 of B cells and the eventual disappearance of pathogenic autoantibodies is contradicted by  
6  
7 several observations. For instance, although circulating autoantibodies may indeed decline,  
8  
9 they seldom disappear [15], and both non-circulating B cells and autoantibody production in  
10  
11 the synovium are clearly less affected by RTX than their circulating counterparts [16]. Other  
12  
13 proposals for RTX mode of action in RA include the immune complex decoy hypothesis,  
14  
15 suggesting that RTX-opsonized B cells keep disease-promoting FcγR-expressing phagocytic  
16  
17 cells busy eliminating B cells instead of perpetuating synovial inflammation [17]. In this  
18  
19 context, one would expect that the more pronounced activation of *FCGR3A*-158VV  
20  
21 macrophages would render them less prone to divert from the immune complex driven  
22  
23 rheumatoid inflammation in the synovium, and hence corresponding to a worse therapeutic  
24  
25 outcome in 158VV patients as seen in the current study. Alternatively, *FCGR3A*-158VV  
26  
27 individuals could, as compared to *FCGR3A*-158FF, handle RTX-opsonized B cells more  
28  
29 efficiently and may thereby, to a greater extent and more rapidly, return from this drug-  
30  
31 induced diversion. Our finding of a significantly higher response rate among heterozygous  
32  
33 patients could possibly point towards several mechanisms being involved in RTX action and  
34  
35 that, in RA, these are most optimally balanced in individuals with the intermediate binding  
36  
37 variant of FcγRIIIA, *i.e.* *FCGR3A*-158VF.  
38  
39  
40  
41  
42  
43

44 A previous study on RA patients reported that the proportion of responders among 158VF  
45  
46 patients was significantly higher compared to 158FF cases, but that the proportion of  
47  
48 responders among 158VV were similar to 158VF, albeit failing to reach statistical  
49  
50 significance when compared to 158VF or 158FF [6]. Merging the response data from the two  
51  
52 studies yields a significantly better response rate among 158VF as compared to 158FF, (OR  
53  
54 2.82 (95% CI 1.44-5.56),  $p=0.001$ ), whereas the 158VV group does not differ significantly  
55  
56  
57  
58  
59  
60

1  
2  
3 from neither 158VF (OR 0.41 (0.15-1.15), p= 0.067) nor 158FF (OR 1.17 (95% CI 0.46-  
4  
5 2.99), p=0.83).  
6  
7

8 Shortcomings of the current study include the fact that therapeutic response was assessed with  
9  
10 up to 3 months variation between patients. However, a separate analysis of patients with  
11  
12 response assessed at 6 month (n=108) yielded similar results, making a major impact of  
13  
14 follow-up time-point unlikely. [Our finding that 158VV patients less frequently experience](#)  
15  
16 [response to RTX is discordant with the findings of Ruysen-Witrand \*et al\*, and the limited](#)  
17  
18 [number of 158VV patients \(in both studies\) adds uncertainty to firm conclusions regarding](#)  
19  
20 [this particular genotype.](#) Further, the relatively limited number of male patients calls for  
21  
22 cautious interpretation of the findings regarding sex differences. Still, we believe the 158VV  
23  
24 sex difference is of interest, as no tendencies towards sex differences were found among  
25  
26 158FF and 158VF patients, despite being substantially larger groups. Also, there are  
27  
28 previously described sex dependent associations of 158VV in RA [7, 10]. [The FCGR locus is](#)  
29  
30 [subject to copy number variation \(CNV\), and in the current study CN of FCGR3A was not](#)  
31  
32 [investigated. However, the the functional consequences of FCGR3A CNV remains unknown,](#)  
33  
34 [and a previous study showed that only 5% of Swedish individuals carry ≠2 copies of](#)  
35  
36 [FCGR3A \[18\].](#)  
37  
38  
39  
40  
41  
42

43 Based on currently available data, we conclude that *FCGR3A-F158V* heterozygosity is  
44  
45 associated with a better response to RTX in RA patients as compared to homozygosity of the  
46  
47 low-affinity F allele. Data regarding patients carrying two high-affinity alleles, 158VV,  
48  
49 remains inconclusive and needs to be resolved before *FCGR3A-F158V* may become clinically  
50  
51 relevant as a predictor of RTX response in RA.  
52  
53  
54  
55  
56  
57  
58  
59  
60

**Conflicts of interests**

RFvV has received research support and honoraria from Roche. None of the other authors declare any conflicts of interest

**Funding**

This work was supported by the County Council of Östergötland; the Tore Nilson Foundation; and the Reinhold Sund Foundation.

peer review only



**Table 1.** Baseline characteristics of the 177 RA patients according to *FCGR3A* genotype.

|                                              | <b>158VV</b><br><b>(n=18)</b> | <b>158VF</b><br><b>(n=78)</b> | <b>158FF</b><br><b>(n=81)</b> | <b>Total</b><br><b>(n=177)</b> |
|----------------------------------------------|-------------------------------|-------------------------------|-------------------------------|--------------------------------|
| Mean (SD) disease duration, years            | 11 (6)                        | 15 (10)                       | 14 (12)                       | 14 (11)                        |
| Females, n (%)                               | 13 (72)                       | 61 (78)                       | 71 (88)                       | 145 (82)                       |
| Rheumatoid factor positive, n (%)            | 12 (67)                       | 62 (81)                       | 63 (78)                       | 137 (78)                       |
| Baseline DAS28, mean (SD)                    | 5.2 (1.0)                     | 5.5 (1.1)                     | 5.5 (1.2)                     | 5.5 (1.1)                      |
| Concurrent DMARD therapy, n (%)              | 15 (83)                       | 48 (62)                       | 59 (73)                       | 122 (69)                       |
| Oral glucocorticoid therapy, n (%) *         | 13 (72)                       | 55 (72) #                     | 48 (64) ##                    | 116 (69) ###                   |
| Number of previous TNF inhibitors, mean (SD) | 1.4 (1.2)                     | 1.3 (1.1)                     | 1.2 (1.1)                     | 1.3 (1.1)                      |

\* Data available on: # 76/78 patients, ## 75/81 patients, ### 169/177 patients.

## References

1. Wu J, Edberg JC, Redecha PB, *et al.* A novel polymorphism of FcγRIIIa (CD16) alters receptor function and predisposes to autoimmune disease. *J Clin Invest* 1997;100:1059-70.
2. Cartron G, Dacheux L, Salles G, *et al.* Therapeutic activity of humanized anti-CD20 monoclonal antibody and polymorphism in IgG Fc receptor FcγRIIIa gene. *Blood* 2002;99:754-8.
3. Treon SP, Hansen M, Branagan AR, *et al.* Polymorphisms in FcγRIIIa (CD16) receptor expression are associated with clinical response to rituximab in Waldenström's macroglobulinemia. *J Clin Oncol* 2005;23:474-81.
4. Uchida J, Hamaguchi Y, Oliver JA, *et al.* The innate mononuclear phagocyte network depletes B lymphocytes through Fc receptor-dependent mechanisms during anti-CD20 antibody immunotherapy. *J Exp Med* 2004;199:1659-69.
5. Dall'Ozzo S, Tartas S, Paintaud G, *et al.* Rituximab-dependent cytotoxicity by natural killer cells: influence of FCGR3A polymorphism on the concentration-effect relationship. *Cancer Res* 2004;64:4664-9.
6. Ruysen-Witrand A, Rouanet S, Combe B, *et al.* Fcγ receptor type IIIA polymorphism influences treatment outcomes in patients with rheumatoid arthritis treated with rituximab. *Ann Rheum Dis*.
7. Kastbom A, Ahmadi A, Soderkvist P, *et al.* The 158V polymorphism of Fc γ receptor type IIIA in early rheumatoid arthritis: increased susceptibility and severity in male patients (the Swedish TIRA project). *Rheumatology (Oxford)* 2005;44:1294-8.
8. Lee YH, Ji JD, Song GG. Associations between FCGR3A polymorphisms and susceptibility to rheumatoid arthritis: a metaanalysis. *J Rheumatol* 2008;35:2129-35.
9. Thabet MM, Huizinga TW, Marques RB, *et al.* Contribution of Fcγ receptor IIIA gene 158V/F polymorphism and copy number variation to the risk of ACPA-positive rheumatoid arthritis. *Ann Rheum Dis* 2009;68:1775-80.
10. Robinson JI, Barrett JH, Taylor JC, *et al.* Dissection of the FCGR3A association with RA: increased association in men and with autoantibody positive disease. *Ann Rheum Dis* 2010;69:1054-7.
11. Kramer PR, Winger V, Kramer SF. 17β-Estradiol utilizes the estrogen receptor to regulate CD16 expression in monocytes. *Mol Cell Endocrinol* 2007;279:16-25.
12. van Gestel AM, Prevoo ML, van 't Hof MA, *et al.* Development and validation of the European League Against Rheumatism response criteria for rheumatoid arthritis. Comparison with the

preliminary American College of Rheumatology and the World Health Organization/International League Against Rheumatism Criteria. *Arthritis Rheum* 1996;39:34-40.

13. Kastbom A, Bratt J, Ernestam S, *et al.* Fcγ receptor type IIIA genotype and response to tumor necrosis factor alpha-blocking agents in patients with rheumatoid arthritis. *Arthritis Rheum* 2007;56:448-52.

14. Anolik JH, Campbell D, Felgar RE, *et al.* The relationship of FcγRIIIa genotype to degree of B cell depletion by rituximab in the treatment of systemic lupus erythematosus. *Arthritis Rheum* 2003;48:455-9.

15. Cambridge G, Leandro MJ, Edwards JC, *et al.* Serologic changes following B lymphocyte depletion therapy for rheumatoid arthritis. *Arthritis Rheum* 2003;48:2146-54.

16. Rosengren S, Wei N, Kalunian KC, *et al.* Elevated autoantibody content in rheumatoid arthritis synovia with lymphoid aggregates and the effect of rituximab. *Arthritis Res Ther* 2008;10:R105.

17. Taylor RP, Lindorfer MA. Drug insight: the mechanism of action of rituximab in autoimmune disease--the immune complex decoy hypothesis. *Nat Clin Pract Rheumatol* 2007;3:86-95.

18. Niederer HA, Willcocks LC, Rayner TF, *et al.* Copy number, linkage disequilibrium and disease association in the FCGR locus. *Hum Mol Genet* [2010](#);19:3282-94.

1  
2  
3  
4 **Figure legends**  
5  
6  
7

8 **Figure 1.**  
9

10 Proportion of rituximab responders in relation to *FCGR3A* genotype in RA patients.  
11

12  
13 Significant differences are indicated \*  $p < 0.05$ , \*\*  $p < 0.01$ .  
14  
15  
16  
17  
18  
19  
20  
21  
22  
23  
24  
25  
26  
27  
28  
29  
30  
31  
32  
33  
34  
35  
36  
37  
38  
39  
40  
41  
42  
43  
44  
45  
46  
47  
48  
49  
50  
51  
52  
53  
54  
55  
56  
57  
58  
59  
60

For peer review only



**Influence of FCGR3A genotype on the therapeutic response to rituximab in rheumatoid arthritis: an observational cohort study**

|                                 |                                                                                                                                                                                                                                                                                                                                                                                                                                                                                                                                                                                                                                                                                                                                                                                                                                                                                                                                                                                                                                                                                                                                                                      |
|---------------------------------|----------------------------------------------------------------------------------------------------------------------------------------------------------------------------------------------------------------------------------------------------------------------------------------------------------------------------------------------------------------------------------------------------------------------------------------------------------------------------------------------------------------------------------------------------------------------------------------------------------------------------------------------------------------------------------------------------------------------------------------------------------------------------------------------------------------------------------------------------------------------------------------------------------------------------------------------------------------------------------------------------------------------------------------------------------------------------------------------------------------------------------------------------------------------|
| Journal:                        | <i>BMJ Open</i>                                                                                                                                                                                                                                                                                                                                                                                                                                                                                                                                                                                                                                                                                                                                                                                                                                                                                                                                                                                                                                                                                                                                                      |
| Manuscript ID:                  | bmjopen-2012-001524.R1                                                                                                                                                                                                                                                                                                                                                                                                                                                                                                                                                                                                                                                                                                                                                                                                                                                                                                                                                                                                                                                                                                                                               |
| Article Type:                   | Research                                                                                                                                                                                                                                                                                                                                                                                                                                                                                                                                                                                                                                                                                                                                                                                                                                                                                                                                                                                                                                                                                                                                                             |
| Date Submitted by the Author:   | 11-Jul-2012                                                                                                                                                                                                                                                                                                                                                                                                                                                                                                                                                                                                                                                                                                                                                                                                                                                                                                                                                                                                                                                                                                                                                          |
| Complete List of Authors:       | Kastbom, Alf; Rheumatology, Department of Clinical and Experimental Medicine, Faculty of Health Sciences, Linköping University, Department of Rheumatology in Ostergotland, County Council of Ostergotland<br>Cöster, Lars; Rheumatology, Department of Clinical and Experimental Medicine, Faculty of Health Sciences, Linköping University, Department of Rheumatology in Ostergotland, County Council of Ostergotland<br>Årlestig, Lisbeth; Department of Public Health and Clinical Medicine/Rheumatology, Umeå University<br>Chatzidionysiou, Katerina; Rheumatology Unit, Department of Medicine, Karolinska University Hospital and Karolinska Institute<br>van Vollenhoven, Ronald; Rheumatology Unit, Department of Medicine, Karolinska University Hospital and Karolinska Institute<br>Padyukov, Leonid; Rheumatology Unit, Department of Medicine, Karolinska University Hospital and Karolinska Institute<br>Rantapaa-Dahlqvist, Solbritt; Department of Public Health and Clinical Medicine/Rheumatology, Umeå University<br>Saevarsdottir, Saedis; Rheumatology Unit, Department of Medicine, Karolinska University Hospital and Karolinska Institute |
| <b>Primary Subject Heading</b>: | Rheumatology                                                                                                                                                                                                                                                                                                                                                                                                                                                                                                                                                                                                                                                                                                                                                                                                                                                                                                                                                                                                                                                                                                                                                         |
| Secondary Subject Heading:      | Rheumatology, Pharmacology and therapeutics, Genetics and genomics                                                                                                                                                                                                                                                                                                                                                                                                                                                                                                                                                                                                                                                                                                                                                                                                                                                                                                                                                                                                                                                                                                   |
| Keywords:                       | RHEUMATOLOGY, IMMUNOLOGY, THERAPEUTICS                                                                                                                                                                                                                                                                                                                                                                                                                                                                                                                                                                                                                                                                                                                                                                                                                                                                                                                                                                                                                                                                                                                               |
|                                 |                                                                                                                                                                                                                                                                                                                                                                                                                                                                                                                                                                                                                                                                                                                                                                                                                                                                                                                                                                                                                                                                                                                                                                      |

SCHOLARONE™  
Manuscripts

1  
2  
3 **Influence of *FCGR3A* genotype on the therapeutic response to rituximab in**  
4 **rheumatoid arthritis: an observational cohort study**  
5  
6

7 Alf Kastbom<sup>1</sup>, Lars Cöster<sup>1</sup>, Lisbeth Ärlestig<sup>2</sup>, Aikaterini Chatzidionysiou<sup>3,4</sup>, Ronald van  
8 Vollenhoven<sup>3,4</sup>, Leonid Padyukov<sup>3</sup>, Solbritt Rantapää-Dahlqvist<sup>2</sup>, Saedis Saevarsdottir<sup>3</sup>  
9  
10

- 11  
12  
13 1. Rheumatology, Department of Clinical and Experimental Medicine, Faculty of Health  
14 Sciences, Linköping University, Department of Rheumatology in Östergötland,  
15 County Council of Östergötland, Linköping, Sweden.  
16  
17  
18 2. Department of Public Health and Clinical Medicine/Rheumatology, Umeå University,  
19 Umeå, Sweden  
20  
21  
22 3. Rheumatology Unit, Department of Medicine, Karolinska University Hospital and  
23 Karolinska Institute, Stockholm, Sweden.  
24  
25  
26 4. Unit for Clinical Therapy Research of Inflammatory Diseases, Department of  
27 Medicine, Karolinska Institute, Stockholm, Sweden.  
28  
29  
30  
31  
32

33  
34 **Corresponding Author:**  
35

36 Dr. Alf Kastbom  
37

38 Department of Clinical and Experimental Medicine, Rheumatology  
39

40 Linköping University  
41

42 SE-581 85 Linköping  
43

44 Sweden  
45

46  
47  
48 alf.kastbom@liu.se  
49  
50  
51  
52

53 **Key words:** Fc gamma receptor, Rheumatoid arthritis, Rituximab, Single nucleotide  
54 polymorphism, Therapy response.  
55  
56  
57  
58  
59  
60

### Article focus

- A functional polymorphism in the gene encoding Fc $\gamma$  receptor type IIIA (*FCGR3A*) influences the outcome of B cell-depleting therapy with rituximab in malignancies.
- Although rituximab is frequently used for the therapy of severe RA, studies on RA patients have been lacking.
- We wished to determine if *FCGR3A*-F158V genotype associates with rituximab efficacy in RA.

### Key Messages:

- *FCGR3A* heterozygous patients experienced significantly higher response rates than 158FF and 158VV patients.
- The results are discordant to a similar recently published study based on 111 RA patients
- There are indications of a sex-specific effect of the 158VV genotype, as have been previously described regarding RA susceptibility and disease course.

### Strengths and limitations:

- Although limited by the small numbers of males and 158VV patients, this is until now the largest published study on *FCGR3A* and rituximab in RA patients.
- Differences could have been attenuated by the ‘real-life’ approach, *i.e.* that therapy was not administered by a standardised scheme, and the time to evaluation varied between patients.

### Abstract

**Objectives:** To determine whether a polymorphism in the Fc $\gamma$  receptor type IIIA (*FCGR3A*-F158V), influencing IgG binding affinity, relates to the therapeutic efficacy of rituximab in rheumatoid arthritis (RA) patients.

**Design:** Observational cohort study

**Setting:** Three university hospital rheumatology units in Sweden.

1  
2  
3 **Participants:** Patients with established RA (n=177; 145 females and 32 males) who started  
4 rituximab (Mabthera) as part of routine care.  
5  
6

7  
8 **Primary outcome measures:** Response to rituximab therapy in relation to FCGR3A genotype,  
9 including stratification for sex.  
10  
11

12  
13 **Results:** The frequency of responders differed significantly across *FCGR3A* genotypes  
14 ( $P=0.017$  in a 3x2 contingency table). Heterozygous patients showed the highest response rate  
15 at 83%, as compared to patients carrying 158FF (68%) or 158VV (56%) ( $p=0.028$  and  
16  $p=0.016$ , respectively). Among 158VV patients, response rates differed between male and  
17 female patients ( $p=0.036$ ), but not among 158FF or 158VF patients ( $p=0.72$  and  $p=0.46$ ,  
18 respectively).  
19  
20  
21  
22  
23  
24  
25  
26

27 **Conclusions:** Therapeutic efficacy of rituximab in RA patients is influenced by *FCGR3A*  
28 genotype, with the highest response rates found among heterozygous patients. This may  
29 suggest that different rituximab mechanisms of action in RA are optimally balanced in  
30 *FCGR3A*-158VF patients. Similar to the previously described associations with RA  
31 susceptibility and disease course, the impact of 158VV on rituximab response may be  
32 influenced by sex.  
33  
34  
35  
36  
37  
38  
39  
40  
41  
42  
43  
44  
45  
46  
47

## 48 **Introduction**

49  
50  
51 The growing arsenal of biologic agents available in rheumatoid arthritis (RA)  
52 pharmacotherapy increases the demand for predictors of therapeutic responses and/or side  
53 effects. Human Fc $\gamma$  receptors mediate effector functions of IgG antibodies and may modulate  
54  
55  
56  
57  
58  
59  
60



1  
2  
3 the therapeutic efficacy of all biologic substances containing IgG-Fc parts. Hence, a  
4  
5 functional single nucleotide polymorphism in *FCGR3A* (*FCGR3A*-F158V, rs396991),  
6  
7 influencing IgG binding affinity to the activating Fcγ receptor type IIIA (FcγRIIIA) [1], has  
8  
9 been associated with the therapeutic efficacy of rituximab (RTX), *i.e.* an anti-CD20 B cell  
10  
11 depleting IgG1 monoclonal antibody, in B cell malignancies [2, 3]. RTX-coated B cells may  
12  
13 be eliminated by several mechanisms; complement-dependent cytotoxicity, antibody-  
14  
15 dependent cytotoxicity (ADCC) by Natural Killer (NK) cells, and/or phagocytosis by FcγR-  
16  
17 bearing cells. Although the relevance in humans has not been established, mice lacking proper  
18  
19 complement or NK-cell functions are equally well B-cell depleted as native animals, thus  
20  
21 pointing towards a major role of FcγR-bearing macrophages [4]. It has been convincingly  
22  
23 shown that RTX binds with higher affinity to 158V in an allele-dose dependent manner and  
24  
25 that ADCC by NK cells are affected accordingly [5]. Data regarding *FCGR3A* genotype and  
26  
27 RTX efficacy in RA has been lacking until recently, when Ruysen-Witrand *et al* reported an  
28  
29 association between carriage of the high-affinity binding valine (V) allele of *FCGR3A* and  
30  
31 higher response rates to RTX [6].  
32  
33  
34  
35  
36

37 Numerous case-control studies have been performed with regard to *FCGR3A*-F158V and RA  
38  
39 susceptibility. Although initial studies showed remarkably discordant results, subsequent  
40  
41 investigations have shown an association between homozygosity of the high-affinity allele  
42  
43 (158VV) and an increased risk of RA in Europeans [7-10]. In studies presenting data stratified  
44  
45 for sex, the increased risk conferred by the 158VV genotype only attributes to the male  
46  
47 population [7, 10]. In line with this, male patients with early RA carrying 158V have a more  
48  
49 severe disease course whereas, intriguingly, in female patients the opposite is seen [7]. The  
50  
51 biological basis for this sex difference is yet to be elucidated, but it has been shown that  
52  
53  
54  
55  
56  
57  
58  
59  
60

1  
2  
3 estrogen influences both Fc $\gamma$ RIIIA expression and Fc $\gamma$ RIIIA-mediated release of TNF and IL-  
4  
5 1 $\beta$  from monocytic cells [11].  
6  
7

8 The current study was conducted to explore the influence of *FCGR3A* genotype on RTX  
9 efficacy in RA patients.  
10  
11  
12

### 13 14 15 16 17 **Patients & Methods**

18  
19 Patients with established RA (n=177; 145 females and 32 males) who started RTX  
20 (Mabthera) as part of routine care at three rheumatology clinics in Sweden (Karolinska  
21 University Hospital, Solna; Linköping University Hospital, Linköping; and Umeå University  
22 Hospital, Umeå) were included in the study. Baseline characteristics and concurrent  
23 medication are shown in table 1. The therapeutic response was assessed by the EULAR  
24 response criteria after 3-6 months [12]. DNA was extracted from whole blood by standard  
25 techniques and *FCGR3A*-F158V was genotyped by a commercially available TaqMan assay  
26 (Applied Biosystems, ID C\_25815666\_10). Validation of the TaqMan results was performed  
27 in 30 samples (10 of each genotype), yielding 100% concordance with a previously described  
28 direct sequencing assay specific for *FCGR3A* [7].  
29  
30  
31  
32  
33  
34  
35  
36  
37  
38  
39  
40  
41  
42  
43  
44  
45

### 46 **Statistical analysis**

47  
48 Response rates were compared by chi square test across *FCGR3A* genotypes, and by Fisher's  
49 exact test between sexes. Baseline characteristics were tested by chi square test for categorical  
50 variables and by one-way ANOVA for continuous variables. Two-sided p-values <0.05 were  
51 considered significant. Analyses were performed using SPSS version 19.  
52  
53  
54  
55  
56  
57  
58  
59  
60

### ***Ethical considerations***

Informed consent was obtained from all patients according to the Declaration of Helsinki. The study protocol was approved by the regional ethics committees in Linköping, Stockholm, and Umeå.

### **Results**

Overall, 130 patients (73%) achieved a moderate or good EULAR response, whereas 47 (27%) were non-responders. The distribution of *FCGR3A* genotypes was 81 (46%) 158FF, 78 (44%) 158VF, and 18 (10%) 158VV, which is in agreement with previous findings in Swedish RA populations [7, 13], and in Hardy-Weinberg equilibrium ( $p>0.95$ ). The proportion of EULAR good responders did not differ significantly across *FCGR3A* genotypes (21%, 26%, and 28% for 158FF, 158VF, and 158VV, respectively). However, the proportion of good and moderate responders together, compared to non-responders, was significantly different across *FCGR3A* genotypes ( $p=0.017$  in a 3x2 contingency table), where heterozygous patients showed the highest response rate (65 out of 78 patients, 83%), as compared to 55/81 (68%) patients carrying 158FF (OR 2.36, 95% CI 1.04-5.41,  $p=0.028$ ), and 10/18 (56%) 158VV patients (OR 4.0, 95%CI 1.16-13.9,  $p=0.016$ )(figure 1). The frequency of responders was not significantly different between 158FF and 158VV (OR 1.69 (95% CI 0.53-5.37),  $p=0.4$ ). Baseline characteristics (table 1) revealed no significant differences across *FCGR3A* genotypes. Experiencing a therapeutic response was more common among rheumatoid factor (RF) positive cases as compared to RF-negative cases (OR 2.38 (1.05-5.39),  $p=0.038$ ), and in the RF-positive group, response rates remained significantly different

1  
2  
3 across *FCGR3A* genotype ( $p=0.004$ ), but did not reach statistical significance among RF-  
4  
5 negative cases ( $p=0.056$ ). After stratifying for sex, response rates among female patients  
6  
7 remained different in 158VF as compared to 158FF ( $p=0.047$ ) and 158VV ( $p=0.001$ ), but this  
8  
9 was not seen in the smaller group of males ( $p>0.4$ ) (figure 1). Furthermore, among 158VV  
10  
11 patients, men had significantly higher response rates than women (100% vs 39%, respectively,  
12  
13  $p=0.036$ ), while therapeutic response among 158FF or 158VF patients did not differ between  
14  
15 men and women ( $p=0.72$  and  $p=0.46$ , respectively). Absolute changes in DAS28 in relation to  
16  
17 *FCGR3A* yielded similar results as for categorical EULAR responses (data not shown).  
18  
19

## 20 21 22 23 24 25 Discussion

26  
27  
28 Although an influence of *FCGR3A*-F158V on RTX efficacy was in line with our hypothesis,  
29  
30 the lack of a clear allele-dose effect points towards a more complex role of *FCGR3A* in RTX  
31  
32 therapy of RA than anticipated. Based on previous reports of increased RTX-induced ADCC  
33  
34 [5], more pronounced peripheral B-cell depletion [14], better clinical outcomes in B-cell  
35  
36 malignancies [2, 3], we expected any difference to appear in favor of the 158VV genotype.  
37  
38 Also, a recent study on 111 RA patients described an association between the 158V allele and  
39  
40 response to RTX [6]. Our study is, to our knowledge, the largest on this topic to date, and we  
41  
42 surprisingly found a significantly larger proportion of responders among *FCGR3A*-F158V  
43  
44 heterozygous patients, a finding to which there is no immediate explanation from previous  
45  
46 experimental work. Regarding the *in vivo* situation little is known, however, as the  
47  
48 mechanisms whereby RTX reduces signs and symptoms of RA remain incompletely  
49  
50 understood. The initial view that the disease-modifying action of RTX depends on depletion  
51  
52 of B cells and the eventual disappearance of pathogenic autoantibodies is contradicted by  
53  
54  
55  
56  
57  
58  
59  
60

1  
2  
3 several observations. For instance, although circulating autoantibodies may indeed decline,  
4  
5 they seldom disappear [15], and both non-circulating B cells and autoantibody production in  
6  
7 the synovium are clearly less affected by RTX than their circulating counterparts [16]. Other  
8  
9 proposals for RTX mode of action in RA include the immune complex decoy hypothesis,  
10  
11 suggesting that RTX-opsonized B cells keep disease-promoting FcγR-expressing phagocytic  
12  
13 cells busy eliminating B cells instead of perpetuating synovial inflammation [17]. In this  
14  
15 context, one would expect that the more pronounced activation of *FCGR3A*-158VV  
16  
17 macrophages would render them less prone to divert from the immune complex driven  
18  
19 rheumatoid inflammation in the synovium, and hence corresponding to a worse therapeutic  
20  
21 outcome in 158VV patients as seen in the current study. Alternatively, *FCGR3A*-158VV  
22  
23 individuals could, as compared to *FCGR3A*-158FF, handle RTX-opsonized B cells more  
24  
25 efficiently and may thereby, to a greater extent and more rapidly, return from this drug-  
26  
27 induced diversion. Our finding of a significantly higher response rate among heterozygous  
28  
29 patients could possibly point towards several mechanisms being involved in RTX action and  
30  
31 that, in RA, these are most optimally balanced in individuals with the intermediate binding  
32  
33 variant of FcγRIIIA, *i.e.* *FCGR3A*-158VF.  
34  
35  
36  
37  
38  
39

40 A previous study on RA patients reported that the proportion of responders among 158VF  
41  
42 patients was significantly higher compared to 158FF cases, but that the proportion of  
43  
44 responders among 158VV were similar to 158VF, albeit failing to reach statistical  
45  
46 significance when compared to 158VF or 158FF [6]. Merging the response data from the two  
47  
48 studies yields a significantly better response rate among 158VF as compared to 158FF, (OR  
49  
50 2.82 (95% CI 1.44-5.56),  $p=0.001$ ), whereas the 158VV group does not differ significantly  
51  
52 from neither 158VF (OR 0.41 (0.15-1.15),  $p=0.067$ ) nor 158FF (OR 1.17 (95% CI 0.46-  
53  
54 2.99),  $p=0.83$ ).  
55  
56  
57  
58  
59  
60

1  
2  
3 Shortcomings of the current study include the fact that therapeutic response was assessed with  
4  
5 up to 3 months variation between patients. However, a separate analysis of patients with  
6  
7 response assessed at 6 month (n=108) yielded similar results, making a major impact of  
8  
9 follow-up time-point unlikely. Our finding that 158VV patients less frequently experience  
10  
11 response to RTX is discordant with the findings of Ruysen-Witrand *et al*, and the limited  
12  
13 number of 158VV patients (in both studies) adds uncertainty to firm conclusions regarding  
14  
15 this particular genotype. Further, the relatively limited number of male patients calls for  
16  
17 cautious interpretation of the findings regarding sex differences. Still, we believe the 158VV  
18  
19 sex difference is of interest, as no tendencies towards sex differences were found among  
20  
21 158FF and 158VF patients, despite being substantially larger groups. Also, there are  
22  
23 previously described sex dependent associations of 158VV in RA [7, 10]. The *FCGR* locus is  
24  
25 subject to copy number variation (CNV), and in the current study CN of *FCGR3A* was not  
26  
27 investigated. However, the the functional consequences of *FCGR3A* CNV remains unknown,  
28  
29 and a previous study showed that only 5% of Swedish individuals carry  $\neq 2$  copies of *FCGR3A*  
30  
31 [18].  
32  
33  
34  
35  
36

37 Based on currently available data, we conclude that *FCGR3A-F158V* heterozygosity is  
38  
39 associated with a better response to RTX in RA patients as compared to homozygosity of the  
40  
41 low-affinity F allele. Data regarding patients carrying two high-affinity alleles, 158VV,  
42  
43 remains inconclusive and needs to be resolved before *FCGR3A-F158V* may become clinically  
44  
45 relevant as a predictor of RTX response in RA.  
46  
47  
48  
49  
50  
51  
52  
53  
54  
55  
56  
57  
58  
59  
60

## Conflicts of interests

RFvV has received research support and honoraria from Roche. None of the other authors declare any conflicts of interest

## Funding

This work was supported by the County Council of Östergötland; the Tore Nilson Foundation; and the Reinhold Sund Foundation.

## Contributorship Statement

AK were involved in conception and design of the study, acquisition of patient data, genotyping, and drafted the paper. LÄ and LP were involved in design of the study, genotyping, and interpretation of results. LC, AC, RvV, SR-D, and SS were involved in design of the study, and acquisition of patient data, and interpretation of result. All authors revised the draft paper.

## Data Sharing Statement

There is no additional data available

**Table 1.** Baseline characteristics of the 177 RA patients according to *FCGR3A* genotype.

|                                              | <b>158VV</b><br><b>(n=18)</b> | <b>158VF</b><br><b>(n=78)</b> | <b>158FF</b><br><b>(n=81)</b> | <b>Total</b><br><b>(n=177)</b> |
|----------------------------------------------|-------------------------------|-------------------------------|-------------------------------|--------------------------------|
| Mean (SD) disease duration, years            | 11 (6)                        | 15 (10)                       | 14 (12)                       | 14 (11)                        |
| Females, n (%)                               | 13 (72)                       | 61 (78)                       | 71 (88)                       | 145 (82)                       |
| Rheumatoid factor positive, n (%)            | 12 (67)                       | 62 (81)                       | 63 (78)                       | 137 (78)                       |
| Baseline DAS28, mean (SD)                    | 5.2 (1.0)                     | 5.5 (1.1)                     | 5.5 (1.2)                     | 5.5 (1.1)                      |
| Concurrent DMARD therapy, n (%)              | 15 (83)                       | 48 (62)                       | 59 (73)                       | 122 (69)                       |
| Oral glucocorticoid therapy, n (%) *         | 13 (72)                       | 55 (72) #                     | 48 (64) ##                    | 116 (69) ###                   |
| Number of previous TNF inhibitors, mean (SD) | 1.4 (1.2)                     | 1.3 (1.1)                     | 1.2 (1.1)                     | 1.3 (1.1)                      |

\* Data available on: # 76/78 patients, ## 75/81 patients, ### 169/177 patients.



## References

1. Wu J, Edberg JC, Redecha PB, *et al.* A novel polymorphism of FcγRIIIa (CD16) alters receptor function and predisposes to autoimmune disease. *J Clin Invest* 1997;100:1059-70.
2. Cartron G, Dacheux L, Salles G, *et al.* Therapeutic activity of humanized anti-CD20 monoclonal antibody and polymorphism in IgG Fc receptor FcγRIIIa gene. *Blood* 2002;99:754-8.
3. Treon SP, Hansen M, Branagan AR, *et al.* Polymorphisms in FcγRIIIA (CD16) receptor expression are associated with clinical response to rituximab in Waldenstrom's macroglobulinemia. *J Clin Oncol* 2005;23:474-81.
4. Uchida J, Hamaguchi Y, Oliver JA, *et al.* The innate mononuclear phagocyte network depletes B lymphocytes through Fc receptor-dependent mechanisms during anti-CD20 antibody immunotherapy. *J Exp Med* 2004;199:1659-69.
5. Dall'Ozzo S, Tartas S, Paintaud G, *et al.* Rituximab-dependent cytotoxicity by natural killer cells: influence of FCGR3A polymorphism on the concentration-effect relationship. *Cancer Res* 2004;64:4664-9.
6. Ruysen-Witrand A, Rouanet S, Combe B, *et al.* Fcγ receptor type IIIA polymorphism influences treatment outcomes in patients with rheumatoid arthritis treated with rituximab. *Ann Rheum Dis*.
7. Kastbom A, Ahmadi A, Soderkvist P, *et al.* The 158V polymorphism of Fcγ receptor type IIIA in early rheumatoid arthritis: increased susceptibility and severity in male patients (the Swedish TIRA project). *Rheumatology (Oxford)* 2005;44:1294-8.
8. Lee YH, Ji JD, Song GG. Associations between FCGR3A polymorphisms and susceptibility to rheumatoid arthritis: a metaanalysis. *J Rheumatol* 2008;35:2129-35.

- 1  
2  
3 9. Thabet MM, Huizinga TW, Marques RB, *et al.* Contribution of Fcγ3 receptor IIIA gene 158V/F polymorphism and copy number variation to the risk of ACPA-  
4  
5  
6  
7  
8  
9  
10  
11  
12  
13  
14  
15  
16  
17  
18  
19  
20  
21  
22  
23  
24  
25  
26  
27  
28  
29  
30  
31  
32  
33  
34  
35  
36  
37  
38  
39  
40  
41  
42  
43  
44  
45  
46  
47  
48  
49  
50  
51  
52  
53  
54  
55  
56  
57  
58  
59  
60  
positive rheumatoid arthritis. *Ann Rheum Dis* 2009;68:1775-80.
10. Robinson JI, Barrett JH, Taylor JC, *et al.* Dissection of the FCGR3A association with RA: increased association in men and with autoantibody positive disease. *Ann Rheum Dis* 2010;69:1054-7.
11. Kramer PR, Winger V, Kramer SF. 17β-Estradiol utilizes the estrogen receptor to regulate CD16 expression in monocytes. *Mol Cell Endocrinol* 2007;279:16-25.
12. van Gestel AM, Prevoo ML, van 't Hof MA, *et al.* Development and validation of the European League Against Rheumatism response criteria for rheumatoid arthritis. Comparison with the preliminary American College of Rheumatology and the World Health Organization/International League Against Rheumatism Criteria. *Arthritis Rheum* 1996;39:34-40.
13. Kastbom A, Bratt J, Ernestam S, *et al.* Fcγ3 receptor type IIIA genotype and response to tumor necrosis factor alpha-blocking agents in patients with rheumatoid arthritis. *Arthritis Rheum* 2007;56:448-52.
14. Anolik JH, Campbell D, Felgar RE, *et al.* The relationship of Fcγ3RIIIa genotype to degree of B cell depletion by rituximab in the treatment of systemic lupus erythematosus. *Arthritis Rheum* 2003;48:455-9.
15. Cambridge G, Leandro MJ, Edwards JC, *et al.* Serologic changes following B lymphocyte depletion therapy for rheumatoid arthritis. *Arthritis Rheum* 2003;48:2146-54.
16. Rosengren S, Wei N, Kalunian KC, *et al.* Elevated autoantibody content in rheumatoid arthritis synovia with lymphoid aggregates and the effect of rituximab. *Arthritis Res Ther* 2008;10:R105.

1  
2  
3 17. Taylor RP, Lindorfer MA. Drug insight: the mechanism of action of rituximab  
4 in autoimmune disease--the immune complex decoy hypothesis. *Nat Clin Pract Rheumatol*  
5 2007;3:86-95.  
6  
7

8  
9 18. Niederer HA, Willcocks LC, Rayner TF, *et al.* Copy number, linkage  
10 disequilibrium and disease association in the FCGR locus. *Hum Mol Genet* 2010;19:3282-94.  
11  
12  
13  
14  
15  
16  
17  
18  
19  
20  
21  
22  
23  
24  
25  
26  
27  
28  
29  
30  
31  
32  
33  
34  
35  
36  
37  
38  
39  
40  
41  
42  
43  
44  
45  
46  
47  
48  
49  
50  
51  
52  
53  
54  
55  
56  
57  
58  
59  
60

For peer review only

1  
2  
3  
4 **Figure legends**  
5  
6  
7

8 **Figure 1.**  
9

10 Proportion of rituximab responders in relation to *FCGR3A* genotype in RA patients.  
11

12  
13 Significant differences are indicated \*  $p < 0.05$ , \*\*  $p < 0.01$ .  
14  
15  
16  
17  
18  
19  
20  
21  
22  
23  
24  
25  
26  
27  
28  
29  
30  
31  
32  
33  
34  
35  
36  
37  
38  
39  
40  
41  
42  
43  
44  
45  
46  
47  
48  
49  
50  
51  
52  
53  
54  
55  
56  
57  
58  
59  
60

For peer review only

Figure 1.

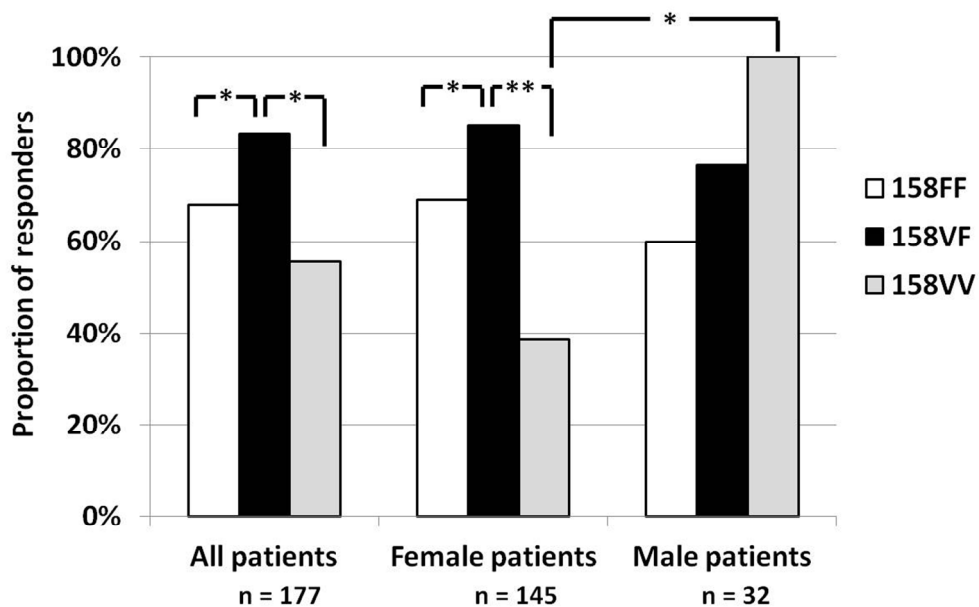

203x153mm (150 x 150 DPI)

ew only

## STROBE Statement—checklist of items that should be included in reports of observational studies

|                              | Item No | Recommendation                                                                                                                                                                                                                                                                                                                                                                                                                                                                                                                                                                                                                                                                                   |
|------------------------------|---------|--------------------------------------------------------------------------------------------------------------------------------------------------------------------------------------------------------------------------------------------------------------------------------------------------------------------------------------------------------------------------------------------------------------------------------------------------------------------------------------------------------------------------------------------------------------------------------------------------------------------------------------------------------------------------------------------------|
| <b>Title and abstract</b>    | 1       | (a) Indicate the study's design with a commonly used term in the title or the abstract<br>(b) Provide in the abstract an informative and balanced summary of what was done and what was found                                                                                                                                                                                                                                                                                                                                                                                                                                                                                                    |
| <b>Introduction</b>          |         |                                                                                                                                                                                                                                                                                                                                                                                                                                                                                                                                                                                                                                                                                                  |
| Background/rationale         | 2       | Explain the scientific background and rationale for the investigation being reported                                                                                                                                                                                                                                                                                                                                                                                                                                                                                                                                                                                                             |
| Objectives                   | 3       | State specific objectives, including any prespecified hypotheses                                                                                                                                                                                                                                                                                                                                                                                                                                                                                                                                                                                                                                 |
| <b>Methods</b>               |         |                                                                                                                                                                                                                                                                                                                                                                                                                                                                                                                                                                                                                                                                                                  |
| Study design                 | 4       | Present key elements of study design early in the paper                                                                                                                                                                                                                                                                                                                                                                                                                                                                                                                                                                                                                                          |
| Setting                      | 5       | Describe the setting, locations, and relevant dates, including periods of recruitment, exposure, follow-up, and data collection                                                                                                                                                                                                                                                                                                                                                                                                                                                                                                                                                                  |
| Participants                 | 6       | (a) <i>Cohort study</i> —Give the eligibility criteria, and the sources and methods of selection of participants. Describe methods of follow-up<br><i>Case-control study</i> —Give the eligibility criteria, and the sources and methods of case ascertainment and control selection. Give the rationale for the choice of cases and controls<br><i>Cross-sectional study</i> —Give the eligibility criteria, and the sources and methods of selection of participants<br>(b) <i>Cohort study</i> —For matched studies, give matching criteria and number of exposed and unexposed<br><i>Case-control study</i> —For matched studies, give matching criteria and the number of controls per case |
| Variables                    | 7       | Clearly define all outcomes, exposures, predictors, potential confounders, and effect modifiers. Give diagnostic criteria, if applicable                                                                                                                                                                                                                                                                                                                                                                                                                                                                                                                                                         |
| Data sources/<br>measurement | 8*      | For each variable of interest, give sources of data and details of methods of assessment (measurement). Describe comparability of assessment methods if there is more than one group                                                                                                                                                                                                                                                                                                                                                                                                                                                                                                             |
| Bias                         | 9       | Describe any efforts to address potential sources of bias                                                                                                                                                                                                                                                                                                                                                                                                                                                                                                                                                                                                                                        |
| Study size                   | 10      | Explain how the study size was arrived at                                                                                                                                                                                                                                                                                                                                                                                                                                                                                                                                                                                                                                                        |
| Quantitative variables       | 11      | Explain how quantitative variables were handled in the analyses. If applicable, describe which groupings were chosen and why                                                                                                                                                                                                                                                                                                                                                                                                                                                                                                                                                                     |
| Statistical methods          | 12      | (a) Describe all statistical methods, including those used to control for confounding<br>(b) Describe any methods used to examine subgroups and interactions<br>(c) Explain how missing data were addressed<br>(d) <i>Cohort study</i> —If applicable, explain how loss to follow-up was addressed<br><i>Case-control study</i> —If applicable, explain how matching of cases and controls was addressed<br><i>Cross-sectional study</i> —If applicable, describe analytical methods taking account of sampling strategy<br>(e) Describe any sensitivity analyses                                                                                                                                |

Continued on next page

**Results**

|                  |     |                                                                                                                                                                                                                                                                                                                                                                                                               |
|------------------|-----|---------------------------------------------------------------------------------------------------------------------------------------------------------------------------------------------------------------------------------------------------------------------------------------------------------------------------------------------------------------------------------------------------------------|
| Participants     | 13* | (a) Report numbers of individuals at each stage of study—eg numbers potentially eligible, examined for eligibility, confirmed eligible, included in the study, completing follow-up, and analysed<br>(b) Give reasons for non-participation at each stage<br>(c) Consider use of a flow diagram                                                                                                               |
| Descriptive data | 14* | (a) Give characteristics of study participants (eg demographic, clinical, social) and information on exposures and potential confounders<br>(b) Indicate number of participants with missing data for each variable of interest<br>(c) <i>Cohort study</i> —Summarise follow-up time (eg, average and total amount)                                                                                           |
| Outcome data     | 15* | <i>Cohort study</i> —Report numbers of outcome events or summary measures over time<br><i>Case-control study</i> —Report numbers in each exposure category, or summary measures of exposure<br><i>Cross-sectional study</i> —Report numbers of outcome events or summary measures                                                                                                                             |
| Main results     | 16  | (a) Give unadjusted estimates and, if applicable, confounder-adjusted estimates and their precision (eg, 95% confidence interval). Make clear which confounders were adjusted for and why they were included<br>(b) Report category boundaries when continuous variables were categorized<br>(c) If relevant, consider translating estimates of relative risk into absolute risk for a meaningful time period |
| Other analyses   | 17  | Report other analyses done—eg analyses of subgroups and interactions, and sensitivity analyses                                                                                                                                                                                                                                                                                                                |

**Discussion**

|                          |    |                                                                                                                                                                            |
|--------------------------|----|----------------------------------------------------------------------------------------------------------------------------------------------------------------------------|
| Key results              | 18 | Summarise key results with reference to study objectives                                                                                                                   |
| Limitations              | 19 | Discuss limitations of the study, taking into account sources of potential bias or imprecision. Discuss both direction and magnitude of any potential bias                 |
| Interpretation           | 20 | Give a cautious overall interpretation of results considering objectives, limitations, multiplicity of analyses, results from similar studies, and other relevant evidence |
| Generalisability         | 21 | Discuss the generalisability (external validity) of the study results                                                                                                      |
| <b>Other information</b> |    |                                                                                                                                                                            |
| Funding                  | 22 | Give the source of funding and the role of the funders for the present study and, if applicable, for the original study on which the present article is based              |

\*Give information separately for cases and controls in case-control studies and, if applicable, for exposed and unexposed groups in cohort and cross-sectional studies.

**Note:** An Explanation and Elaboration article discusses each checklist item and gives methodological background and published examples of transparent reporting. The STROBE checklist is best used in conjunction with this article (freely available on the Web sites of PLoS Medicine at <http://www.plosmedicine.org/>, Annals of Internal Medicine at <http://www.annals.org/>, and Epidemiology at <http://www.epidem.com/>). Information on the STROBE Initiative is available at [www.strobe-statement.org](http://www.strobe-statement.org).
